# Supplementary material for: Stability of alkalinity in ocean alkalinity enhancement (OAE) approaches – consequences for durability of CO 2 storage
Source: Copernicus journal article supplement (doi:10.5194/bg-20-781-2023), 2023-02-20
Supplement: Supplementary file 1 [file bg-20-781-2023-supplement.zip]

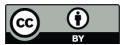

*Supplement of*

**Stability of alkalinity in ocean alkalinity enhancement (OAE) approaches  
– consequences for durability of CO<sub>2</sub> storage**

**Jens Hartmann et al.**

*Correspondence to:* Jens Hartmann (geo@hates.de) and Niels Suitner (niels.suitner@uni-hamburg.de)

- bg-20-781-2023-supplement-title-page.pdf
- Supplement\_Stab\_Alk\_File\_1\_2023\_02\_02.xlsx
- Supplement\_Stab\_Alk\_File\_2\_2022\_11\_14.pdf

The copyright of individual parts of the supplement might differ from the article licence.
