# Supplementary material for: Stability of alkalinity in ocean alkalinity enhancement (OAE) approaches – consequences for durability of CO 2 storage
Source: Copernicus journal article supplement (doi:10.5194/bg-20-781-2023), 2023-02-20
Supplement: Supplementary file 1 [file Supplement_Stab_Alk_File_1_2023_02_02.xlsx]

## Sheet: Accompanying information
Supplement for manuscript: Stability of alkalinity in seawater after alkalinity addition – consequences for OAE application scenarios
Authors: Jens Hartmann1), Niels Suitner1), Carl Lim2), Jan Taucher3), Ulf Riebesell3), Julieta Schneider3), Laura Marín-Samper4), Javier Arístegui Ruiz4), Phil Renforth5) 1) Institute for Geology, Universität Hamburg, Bundesstrasse 55, D-20146 Hamburg, Germany 2) Faculty of Physics/Electrical Engineering, Universität Bremen, Otto-Hahn-Allee 1, 28359 Bremen, Germany 3) Geomar Helmholtz Centre for …
Last update: 02.02.2023
Legend:
abiotic: 0.2 µm filtered treatments biotic: 55 µm filtered treatments runtime: runtime of an experiment TA: Total Alkalinity, measured values dTA: delta Total Alkalinity, achieved or wanted change in TA DIC: Dissolved Inorganic Carbon, values (measured or calculated) pH: pH values (measured or calculated) Omega(cal): saturation state of calcite, calculated values Omega(ar): saturation state of ar…

## Sheet: Exp. I
runtime_abiotic	dTA_added_abiotic	TA_abiotic_measured	runtime_abiotic	dTA_added_abiotic	TA_abiotic_average	TA_abiotic_average_error	DIC_abiotic_calculated	DIC_abiotic_calculated_error	pH_abiotic_measured	pH_abiotic_measured_error	Salinity_abiotic_measured	Salinity_abiotic_measured_error	Omega(cal)_abiotic_calculated	Omega(cal)_abiotic_calculated_error	Omega(ar)_abiotic_calculated	Omega(ar)_abiotic_calculated_error	pCO2_abiotic_calculated	pCO2_abiotic_calculated_error	runtime_biotic	dTA_added_biotic	TA_biotic_measured	TA_biotic_measured_error	DIC_biotic_measured_average	DIC_biotic_measured_average_error	pH_biotic_calculated	pH_biotic_calculated_error	Omega(cal)_biotic_calculated	Omega(cal)_biotic_calculated	Omega(ar)_biotic_calculated	Omega(ar)_biotic_calculated_error	pCO2_biotic_calculated	pCO2_biotic_calculated_error	Stock_solution_treatment_X_1200ml	added_volume_0.5M_Na2CO3_in_1200ml	added_volume_0.5M_NaHCO3_in_1200ml
[days ]	[µmol/kgsw]	[µmol/kgsw]	[days ]	[µmol/kgsw]	[µmol/kgsw]	[µmol/kgsw]	[µmol/kgsw]	[µmol/kgsw]	[]	[]	[]	[]	[]	[]	[]	[]	[ppm]	[ppm]	[days ]	[µmol/kgsw]	[µmol/kgsw]	[µmol/kgsw]	[µmol/kgsw]	[µmol/kgsw]	[]	[]	[]	[]	[]	[]	[ppm]	[ppm]	dTA_added [µmol/kgsw]	[ml]	[ml]
0	0	2417.4	0	0	2410.4	7	2030.34	16.8576	8.15485	0.02	36.6	0.1	6.32365	0.397608	4.15269	0.261111	293.997	18.2064	0	0	2387.9	3.5	2114.6	4.3	7.97	0.014	4.7	0.2	3.1	0.2	486.9	18.1	0	0	0
0	0	2403.36	0	300	2701.9	3.2	2218.93	18.8907	8.24485	0.02	36.6	0.1	8.25904	0.506441	5.42364	0.332582	253.691	16.1698	0	150	2536.8	3.5	2234.6	4.3	8	0.014	5.3	0.3	3.5	0.2	479.7	17.4	300	0.117271	0.465787
0	300	2698.76	0	600	3007.5	0	2448.02	21.1205	8.28485	0.02	36.6	0.1	9.84451	0.597226	6.4648	0.3922	251.518	16.2277	0	300	2684.7	3.5	2358.8	4.3	8.02	0.014	5.8	0.3	3.8	0.2	485	17.4	600	0.242174	0.917649
0	300	2705.12	0	900	3291.9	0.5	2664	23.3092	8.31539	0.02	36.4	0.1	11.3323	0.682328	7.44016	0.447987	252.372	16.4255	0	450	2827.7	3.5	2480.6	4.3	8.03	0.014	6.2	0.3	4.1	0.2	494.2	17.5	900	0.374055	1.35674
0	600	3007.45	0	1200	3581.8	0.6	2877.96	25.6258	8.34539	0.02	36.4	0.1	12.9544	0.773507	8.50514	0.507851	251.27	16.5154	0	600	2981.1	3.5	2592.3	4.3	8.07	0.013	7	0.3	4.6	0.2	469.2	16.4	1200	0.512347	1.78406
0	600	3007.45	0	1500	3862	0.4	3077.63	27.9434	8.37512	0.02	36.5	0.1	14.6548	0.867246	9.62259	0.56946	247.471	16.4394	0	750	3113.2	3.5	2692.3	4.3	8.09	0.013	7.7	0.4	5	0.2	457.9	15.8	1500	0.656553	2.20049
0	900	3292.37	0	1800	4140.9	1.5	3247.65	30.594	8.42539	0.02	36.4	0.1	16.933	0.986928	11.1173	0.647972	227.225	15.3754	0	900	3251.2	3.5	2811.4	4.3	8.1	0.013	8.1	0.4	5.3	0.3	471.3	16.2	1800	0.806238	2.60681
0	900	3291.43	0	2100	4459.7	2.2	3483.02	33.0493	8.44565	0.02	36.3	0.1	18.8146	1.09058	12.3512	0.715939	230.357	15.6872	0	1050	3409.6	3.5	2937.7	4.3	8.12	0.013	8.8	0.4	5.8	0.3	470.4	16	2100	0.961015	3.00371
0	1200	3581.22	0	2400	4759.7	1.2	3725.15	35.079	8.44512	0.02	36.5	0.1	20.1402	1.16757	13.2244	0.766659	246.382	16.769	0	1200	3563.8	3.5	3043	4.3	8.15	0.013	9.7	0.5	6.4	0.3	445.3	15.1	2400	1.12054	3.3918
0	1200	3582.34	1	0	2411.4	0.6	2030.56	15.7042	8.15459	0.02	36.7	0.1	6.32797	0.397325	4.15597	0.260953	294.088	18.1954	4	0	2448.7	3.5	2098.6	4.3	8.09	0.014	5.9	0.3	3.9	0.2	360.2	13
0	1500	3861.64	1	300	2710.8	0.1	2250.67	18.2536	8.21485	0.02	36.6	0.1	7.89893	0.488592	5.18716	0.320861	278.576	17.5515	4	150	2586.4	3.5	2222.6	4.3	8.09	0.014	6.3	0.3	4.1	0.2	382.1	13.6
0	1500	3862.39	1	600	3001.8	4.1	2470.89	20.8673	8.25512	0.02	36.5	0.1	9.37244	0.574077	6.15411	0.376957	275.041	17.5418	4	300	2717	3.5	2336.3	4.3	8.09	0.014	6.7	0.3	4.4	0.2	396.5	14
0	1800	4142.44	1	900	3293.7	3.6	2684.43	23.1956	8.29512	0.02	36.5	0.1	10.9983	0.666299	7.22166	0.437512	268.453	17.3445	4	450	2826.5	3.5	2452.9	4.3	8.07	0.014	6.6	0.3	4.4	0.2	444	15.6
0	1800	4139.45	1	1200	3577.3	1.1	2894.85	25.2781	8.32512	0.02	36.5	0.1	12.5559	0.754277	8.24446	0.495282	266.928	17.4128	4	600	2980.8	3.5	2580.2	4.3	8.08	0.013	7.2	0.4	4.7	0.2	448.7	15.6
0	2100	4457.5	1	1500	3856.3	1.2	3096.45	27.5727	8.35512	0.02	36.5	0.1	14.2076	0.846199	9.32896	0.55564	263.066	17.3371	4	750	3115.2	3.5	2690.4	4.3	8.1	0.013	7.7	0.4	5.1	0.2	452.2	15.6
0	2100	4461.99	1	1800	4147.1	4.5	3302.87	30.1964	8.38512	0.02	36.5	0.1	16.0195	0.945908	10.5187	0.621111	258.342	17.2076	4	900	3257	3.5	2803.7	4.3	8.11	0.013	8.3	0.4	5.5	0.3	451.9	15.5
0	2400	4758.52	1	2100	4471.7	7.5	3518.06	33.37	8.42512	0.02	36.5	0.1	18.3511	1.07068	12.0497	0.703039	246.154	16.642	4	1050	3411.7	3.5	2931.8	4.3	8.13	0.013	8.9	0.4	5.9	0.3	458.8	15.7
0	2400	4760.95	1	2400	4755.9	4.7	3722.05	35.2487	8.44512	0.02	36.5	0.1	20.1234	1.16676	13.2134	0.766128	246.177	16.7571	4	1200	3566.9	3.5	3043.1	4.3	8.15	0.013	9.8	0.5	6.4	0.3	442.1	15
1	0	2410.84	4	0	2414.9	7.4	2013.51	17.4218	8.18485	0.02	36.6	0.1	6.65904	0.415268	4.37293	0.272708	269.642	16.8817
1	0	2411.97	4	300	2705.7	1.9	2239.05	18.4437	8.22512	0.02	36.5	0.1	8.00981	0.494143	5.25939	0.32447	269.878	17.0638
1	300	2710.93	4	600	3003.1	2.5	2453.29	21.0392	8.27485	0.02	36.6	0.1	9.67784	0.588965	6.35535	0.386776	258.913	16.6426
1	300	2710.74	4	900	3293.5	1.3	2673.43	23.2094	8.30485	0.02	36.6	0.1	11.1699	0.674329	7.33514	0.442834	260.269	16.8845
1	600	3005.95	4	1200	3578.9	0.7	2884.37	25.4749	8.33485	0.02	36.6	0.1	12.7547	0.763609	8.37587	0.501465	258.848	16.9576
1	600	2997.72	4	1500	3856.4	2.1	3084.78	27.7882	8.36512	0.02	36.5	0.1	14.4196	0.856104	9.46815	0.562144	254.975	16.8713
1	900	3290.12	4	1800	4137.6	2.1	3281.09	30.1458	8.39485	0.02	36.6	0.1	16.2157	0.953978	10.6487	0.626479	249.638	16.6992
1	900	3297.24	4	2100	4467.8	2.6	3514.86	32.8403	8.42512	0.02	36.5	0.1	18.3344	1.06927	12.0387	0.702114	245.93	16.6222
1	1200	3578.41	4	2400	4747.8	1.2	3715.44	34.9986	8.44512	0.02	36.5	0.1	20.0877	1.1645	13.19	0.764642	245.74	16.7261
1	1200	3576.16
1	1500	3855.09
1	1500	3857.53
1	1800	4142.63
1	1800	4151.62
1	2100	4464.24
1	2100	4479.22
1	2400	4751.22
1	2400	4760.58
4	0	2422.26
4	0	2407.47
4	300	2703.81
4	300	2707.56
4	600	3000.52
4	600	3005.58
4	900	3294.8
4	900	3292.18
4	1200	3578.22
4	1200	3579.53
4	1500	3854.34
4	1500	3858.46
4	1800	4135.52
4	1800	4139.64
4	2100	4470.42
4	2100	4465.18
4	2400	4746.54
4	2400	4748.97
Raw data experiment: I
Description:
CO2-equilibrated treatments, stability of alkalinity experiments - with TA enhanced seawater 0-2400 µmol/kgsw, runtime 4 days, biotic treatment 55µm filterd, abiotic 0.2 µm filtered
Errors determined by uncertainty calculations in CO2SYS_v2.5, if replicates are available resulting deviations were included
Figures: 1 and 3

## Sheet: Exp. II
runtime_abiotic	dTA_added_abiotic	TA_abiotic_measured	runtime_abiotic	dTA_added_abiotic	TA_abiotic_measured	TA_abiotic_measured_error	DIC_abiotic_calculated	DIC_abiotic_calculated_error	pH_abiotic_measured	pH_abiotic_measured_error	Salinity_abiotic_measured	Salinity_abiotic_measured_error	Omega(cal)_abiotic_calculated	Omega(cal)_abiotic_calculated_error	Omega(ar)_abiotic_calculated	Omega(ar)_abiotic_calculated_error	pCO2_abiotic_calculated	pCO2_abiotic_calculated_error	runtime_biotic	dTA_added_biotic	TA_biotic_measured	TA_biotic_measured_error	DIC_biotic_measured	DIC_biotic_measured_error	pH_biotic_calculated	pH_biotic_calculated_error	Omega(cal)_biotic_calculated	Omega(cal)_biotic_calculated_error	Omega(ar)_biotic_calculated	Omega(ar)_biotic_calculated_error	pCO2_biotic_calculated	pCO2_biotic_calculated_error	Stock_solution_treatment_X_1200ml	added_volume_0.5M_NaOH_in_1200ml
[days ]	[µmol/kgsw]	[µmol/kgsw]	[days ]	[µmol/kgsw]	[µmol/kgsw]	[µmol/kgsw]	[µmol/kgsw]	[µmol/kgsw]	[]	[]	[]	[]	[]	[]	[]	[]	[ppm]	[ppm]	[days ]	[µmol/kgsw]	[µmol/kgsw]	[µmol/kgsw]	[µmol/kgsw]	[µmol/kgsw]	[]	[]	[]	[]	[]	[]	[ppm]	[ppm]	dTA_added [µmol/kgsw]	[ml]
0	0	2412.53	0	0	2413.5	0.9	2005.91	16.3026	8.19512	0.02	36.5	0.1	6.76322	0.420097	4.44086	0.275849	261.637	16.4144	0	0	2407.3	3.5	2119.4	4.3	8	0.014	4.9	0.2	3.2	0.2	461.4	17.2	0	0
0	0	2414.4	0	300	2694.5	3.2	1930.54	22.0167	8.56539	0.02	36.4	0.1	12.8297	0.709197	8.42322	0.465622	90.3518	6.5538	0	150	2549.5	3.5	2120.4	4.3	8.19	0.013	7.3	0.4	4.8	0.2	283.4	10.1	300	0.72
0	300	2697.63	0	600	3002.3	2.3	1917.05	23.2158	8.81539	0.02	36.4	0.1	18.6105	0.953333	12.2186	0.6259	41.4458	3.3092	0	300	2695.5	3.5	2120.4	4.3	8.34	0.013	9.8	0.5	6.4	0.3	187.2	6.6	600	1.44
0	300	2691.27	0	900	3292.9	2.4	1903.12	21.9158	9.03539	0.02	36.4	0.1	24.1512	1.17665	15.8563	0.772507	19.5281	1.67677	0	450	2842.2	3.5	2122	4.3	8.47	0.013	12.4	0.6	8.1	0.4	130.5	4.6	900	2.16
0	600	2999.96	0	1200	3592.6	1.7	1939.53	20.226	9.20512	0.02	36.5	0.1	28.9767	1.37623	19.0266	0.903628	10.7052	0.962415	0	600	2985.9	3.5	2125.4	4.3	8.58	0.013	14.9	0.7	9.8	0.5	94.7	3.3	1200	2.88
0	600	3004.64	0	1500	3883.5	2.5	1959.99	17.9437	9.39539	0.02	36.4	0.1	33.714	1.57476	22.1347	1.03385	5.19436	0.486896	0	750	3137.3	3.5	2119.6	4.3	8.69	0.013	17.8	0.8	11.7	0.5	66.6	2.4	1500	3.6
0	900	3290.5	0	1800	4158.6	1.2	1977.86	16.2075	9.58565	0.02	36.3	0.1	37.7169	1.74741	24.7598	1.14706	2.42349	0.235068	0	900	3277.5	3.5	2116.8	4.3	8.79	0.013	20.4	0.9	13.4	0.6	48.7	1.8	1800	4.32
0	900	3295.36	0	2100	4443.5	8.6	2013.07	16.6551	9.75539	0.02	36.4	0.1	40.9827	1.897	26.9069	1.24539	1.20316	0.119906	0	1050	3414.8	3.5	2126.2	4.3	8.87	0.013	22.8	1.1	15	0.7	37.4	1.4	2100	5.04
0	1200	3590.95	0	2400	4621.8	2.3	2013.48	16.9616	9.88539	0.02	36.4	0.1	42.5561	1.97015	27.9399	1.29341	0.686567	0.0698207	0	1200	3568.1	3.5	2127.2	4.3	8.97	0.013	25.7	1.2	16.9	0.8	26.8	1	2400	5.76
0	1200	3594.32	1	0	2409.3	4.7	2015.57	16.5048	8.17485	0.02	36.6	0.1	6.53429	0.4083	4.29101	0.268132	277.06	17.2704	4	0	2395.7	3.5	2106.5	4.3	8	0.014	4.9	0.2	3.3	0.2	454	16.9
0	1500	3885.98	1	300	2702.7	0.7	1945.34	21.9152	8.55512	0.02	36.5	0.1	12.7189	0.705091	8.35146	0.462979	93.755	6.77321	4	150	2614.7	3.5	2094.8	4.3	8.29	0.013	8.8	0.4	5.8	0.3	212	7.5
0	1500	3880.93	1	600	3007.5	5.5	1930.62	23.6192	8.80539	0.02	36.4	0.1	18.4875	0.950306	12.1378	0.623913	43.1122	3.43009	4	300	2741.8	3.5	2103.7	4.3	8.4	0.013	10.9	0.5	7.2	0.3	156.5	5.5
0	1800	4157.42	1	900	3301.5	1.7	1927.44	22.2951	9.01539	0.02	36.4	0.1	23.9346	1.17052	15.7141	0.768483	21.2201	1.81051	4	450	2861.9	3.5	2108.7	4.3	8.5	0.013	12.9	0.6	8.5	0.4	119	4.2
0	1800	4159.85	1	1200	3590.1	1.6	1939.11	20.2221	9.20539	0.02	36.4	0.1	28.9768	1.37634	19.0245	0.903597	10.7096	0.96262	4	600	2990	3.5	2111.1	4.3	8.6	0.013	15.2	0.7	10	0.5	89.4	3.2
0	2100	4452.07	1	1500	3858.1	1.3	1945.26	17.8078	9.39539	0.02	36.4	0.1	33.4607	1.56275	21.9684	1.02597	5.15533	0.48332	4	750	3137.6	3.5	2124.8	4.3	8.69	0.013	17.7	0.8	11.7	0.5	67.7	2.4
0	2100	4434.85	1	1800	3860.2	5	1909.14	17.2521	9.44539	0.02	36.4	0.1	33.8527	1.57729	22.2257	1.03551	4.14299	0.392449	4	900	3257.6	3.5	2129.6	4.3	8.77	0.013	19.8	0.9	13.1	0.6	53.2	1.9
0	2400	4624.11	1	2100	3216.5	2.5	1394.74	13.6911	9.68539	0.02	36.4	0.1	27.7057	1.28429	18.19	0.843138	1.12277	0.112343	4	1050	2837.5	3.5	1852.9	4.3	8.74	0.013	16.6	0.8	11	0.5	50.3	1.8
0	2400	4619.43	1	2400	2986.8	1	1199.04	13.8552	9.80539	0.02	36.4	0.1	24.7937	1.15541	16.2781	0.758519	0.57818	0.0597195	4	1200	2350.2	3.5	1544.8	4.3	8.69	0.013	12.8	0.6	8.4	0.4	49.8	1.9
1	0	2414.03	4	0	2418.2	2.3	2017.8	16.266	8.18539	0.02	36.4	0.1	6.66559	0.415375	4.37624	0.272717	270.122	16.8798
1	0	2404.67	4	300	2703.4	0.9	1943.89	21.9439	8.55459	0.02	36.7	0.1	12.7181	0.704671	8.3528	0.462804	93.6779	6.77254
1	300	2701.94	4	600	3013.3	4	1926	23.4085	8.81565	0.02	36.3	0.1	18.6946	0.958173	12.2724	0.629003	41.6508	3.32447
1	300	2703.44	4	900	3298.8	1.6	1918.58	22.1161	9.02592	0.02	36.2	0.1	24.0884	1.1761	15.8113	0.771962	20.4129	1.74621
1	600	3002.02	4	1200	3576.3	0.1	1932.88	20.1537	9.20592	0.02	36.2	0.1	28.8958	1.37263	18.9668	0.900948	10.6889	0.960433
1	600	3013.07	4	1500	2068.5	0.3	1101.73	14.6056	9.04618	0.02	36.1	0.1	14.1336	0.684039	9.27597	0.448921	10.9282	0.957738
1	900	3299.86	4	1800	1554.8	1.9	747.429	11.4966	9.08592	0.02	36.2	0.1	9.99293	0.479746	6.55923	0.314881	6.42378	0.581375
1	900	3303.23	4	2100	1383.5	2.1	539.667	9.42577	9.32618	0.02	36.1	0.1	8.86474	0.419702	5.81798	0.275426	1.88783	0.185955
1	1200	3588.52	4	2400	1375.5	0.5	415.748	9.76617	9.63618	0.02	36.1	0.1	8.11024	0.399193	5.3228	0.261958	0.414315	0.0456671
1	1200	3591.7
1	1500	3856.78
1	1500	3859.4
1	1800	3865.2
1	1800	3855.28
1	2100	3213.93
1	2100	3218.99
1	2400	2985.73
1	2400	2987.79
4	0	2420.58
4	0	2415.9
4	300	2704.37
4	300	2702.5
4	600	3009.32
4	600	3017.37
4	900	3297.24
4	900	3300.42
4	1200	3576.35
4	1200	3576.16
4	1500	2068.27
4	1500	2068.83
4	1800	1552.91
4	1800	1556.65
4	2100	1385.55
4	2100	1381.43
4	2400	1375.07
4	2400	1376
Raw data experiment: II
Description:
Non-CO2-equilibrated treatments, stability of alkalinity experiments - with TA enhanced seawater 0-2400 µmol/kgsw, runtime 4 days, biotic treatment 55µm filterd, abiotic 0.2 µm filtered
Errors determined by uncertainty calculations in CO2SYS_v2.5, if replicates are available resulting deviations were included
Figures: 2 and 3

## Sheet: Exp. III
runtime	dTA_particle_d2400	dTA_blank_d2400	dTA_particle_d2100	dTA_blank_d2100	Omega(ar)_particle_d2400	Omega(ar)_particle_d2400_error	Omega(ar)_blank_d2400	Omega(ar)_blank_d2400_error	Omega(ar)_particle_d2100	Omega(ar)_particle_d2100_error	Omega(ar)_blank_d2100	Omega(ar)_blank_d2100_error	TA_particle_d2400	TA_particle_d2400_error	TA_blank_d2400	TA_blank_d2400_error	TA_particle_d2100	TA_particle_d2100_error	TA_blank_d2100	TA_blank_d2100_error	DIC_particle_d2400	DIC_particle_d2400_error	DIC_blank_d2400	DIC_blank_d2400_error	DIC_particle_d2100	DIC_particle_d2100_error	DIC_blank_d2100	DIC_blank_d2100_error
[days ]	[µmol/kgsw]	[µmol/kgsw]	[µmol/kgsw]	[µmol/kgsw]	[]	[]	[]	[]	[]	[]	[]	[]	[µmol/kgsw]	[µmol/kgsw]	[µmol/kgsw]	[µmol/kgsw]	[µmol/kgsw]	[µmol/kgsw]	[µmol/kgsw]	[µmol/kgsw]	[µmol/kgsw]	[µmol/kgsw]	[µmol/kgsw]	[µmol/kgsw]	[µmol/kgsw]	[µmol/kgsw]	[µmol/kgsw]	[µmol/kgsw]
0	0	0	0	0	13.471	0.703506	13.3257	0.7034	12.1432	0.640156	12.2315	0.648123	4701.14	4.2	4701.97	4.2	4392.93	4.2	4442.73	4.2	3648.99	33.5292	3662.09	33.5077	3432.41	31.1503	3476	31.5068
2	-23.1517	27.4388	-21.9127	13.8272	13.0689	0.692072	13.5319	0.708303	11.8242	0.623634	12.2488	0.649779	4677.99	4.2	4729.41	4.2	4371.02	18.3	4456.56	4.2	3655.88	33.2003	3672.06	33.7526	3434.35	34.1197	3491.26	31.5405
4	-77.0845	20.8761	-53.4499	21.9542	12.3687	0.651572	13.1463	0.691034	11.3598	0.604316	12.1044	0.643602	4624.06	1.3	4722.84	5	4339.48	19	4464.69	4.2	3656.81	31.7726	3696.16	33.364	3438.67	33.8911	3510.47	31.4108
6	-115.865	31.9026	-81.467	24.8747	12.083	0.638464	13.2606	0.701575	11.106	0.591515	12.2518	0.644281	4585.28	4.3	4733.87	13	4311.46	8.3	4467.61	4.2	3637.69	31.5366	3698.54	35.1141	3430.04	30.2451	3500.5	31.4568
8	-178.748	29.153	-142.326	14.9965	11.8849	0.63052	13.2666	0.700074	10.878	0.585638	12.272	0.650186	4522.39	16.9	4731.12	4.8	4250.6	26.5	4457.73	4.2	3587.82	34.1027	3696.86	33.5687	3385.34	36.7672	3489.54	31.5748
10	-257.658	15.8157	-199.431	14.4143	10.891	0.587214	13.1225	0.690209	10.0326	0.54127	11.9983	0.634815	4443.48	3.5	4717.78	3.5	4193.5	25.8	4457.15	4.2	3586.98	29.6278	3692.76	33.1973	3396.01	35.406	3511.18	31.1498
46	-824.331	-284.603	-734.018	-116.315	8.2239	0.451524	10.6236	0.585653	7.4406	0.40947	11.0146	0.586051	3876.81	4.1	4417.37	64.3	3658.91	23.1	4326.42	4.2	3215.56	24.3618	3581.48	62.6075	3053.6	30.2293	3454.21	29.4906
90	-945.271	-693.108	-757.008	-50.4446	7.22626	0.444341	8.43775	0.530316	6.69659	0.370687	10.8812	0.580452	3755.87	111.1	4008.86	138.8	3635.92	9.3	4392.29	4.2	3173.49	101.661	3334.9	124.93	3093.51	22.364	3534.18	29.4216
Raw data experiment: III
Description:
Testing the role of particles as condensation nuclei for mineral precipitation, CO2-equilibrated, stability of alkalinity experiments - with TA enhanced seawater 2100 and 2400 µmol/kgsw, runtime 90 days, added seed material per treatment 120 mg, biotic treatment 55µm filterd
Errors determined by uncertainty calculations in CO2SYS_v2.5, if replicates are available resulting deviations were included
Figure: 4

## Sheet: Exp. IV
runtime_abiotic	TA_added_abiotic	TA_abiotic_measured_Mg(OH)2_I	TA_abiotic_measured_Mg(OH)2_I_error	DIC_abiotic_measured_Mg(OH)2_I	DIC_abiotic_measured_Mg(OH)2_I_error	pH_abiotic_measured_Mg(OH)2_I	pH_abiotic_measured_Mg(OH)2_I_error	Salinity_abiotic_measured_Mg(OH)2_I	Salinity_abiotic_measured_Mg(OH)2_I_error	Omega(Cal)_abiotic_calculated_Mg(OH)2_I	Omega(Cal)_abiotic_calculated_Mg(OH)2_I_error	Omega(Ar)_abiotic_calculated_Mg(OH)2_I	Omega(Ar)_abiotic_calculated_Mg(OH)2_I_error	pCO2_abiotic_calculated_Mg(OH)2_I	pCO2_abiotic_calculated_Mg(OH)2_I_error	TA_abiotic_measured_Mg(OH)2_II	TA_abiotic_measured_Mg(OH)2_II_error	DIC_abiotic_measured_Mg(OH)2_II	DIC_abiotic_measured_Mg(OH)2_II_error	pH_abiotic_measured_Mg(OH)2_II	pH_abiotic_measured_Mg(OH)2_II_error	Salinity_abiotic_measured_Mg(OH)2_II	Salinity_abiotic_measured_Mg(OH)2_II_error	Omega(Cal)_abiotic_calculated_Mg(OH)2_II	Omega(Cal)_abiotic_calculated_Mg(OH)2_II_error	Omega(Ar)_abiotic_calculated_Mg(OH)2_II	Omega(Ar)_abiotic_calculated_Mg(OH)2_II_error	pCO2_abiotic_calculated_Mg(OH)2_II	pCO2_abiotic_calculated_Mg(OH)2_II_error	runtime_biotic	TA_added_biotic	TA_biotic_measured_Mg(OH)2_I	TA_biotic_measured_Mg(OH)2_I_error	DIC_biotic_measured_Mg(OH)2_I	DIC_biotic_measured_Mg(OH)2_I_error	pH_biotic_measured_Mg(OH)2_I	pH_biotic_measured_Mg(OH)2_I_error	Salinity_biotic_calculated_Mg(OH)2_I	Salinity_biotic_measured_Mg(OH)2_I_error	Omega(Cal)_biotic_calculated_Mg(OH)2_I	Omega(Cal)_biotic_calculated_Mg(OH)2_I_error	Omega(Ar)_biotic_calculated_Mg(OH)2_I	Omega(Ar)_biotic_calculated_Mg(OH)2_I_error	pCO2_biotic_calculated_Mg(OH)2_I	pCO2_biotic_calculated_Mg(OH)2_I_error	TA_biotic_measured_Mg(OH)2_II	TA_biotic_measured_Mg(OH)2_II_error	DIC_biotic_measured_Mg(OH)2_II	DIC_biotic_measured_Mg(OH)2_II_error
[days ]	[µmol/kgsw]	[µmol/kgsw]	[µmol/kgsw]	[µmol/kgsw]	[µmol/kgsw]	[]	[]	[]	[]	[]	[]	[]	[]	[ppm]	[ppm]	[µmol/kgsw]	[µmol/kgsw]	[µmol/kgsw]	[µmol/kgsw]	[]	[]	[]	[]	[]	[]	[]	[]	[ppm]	[ppm]	[days ]	[µmol/kgsw]	[µmol/kgsw]	[µmol/kgsw]	[µmol/kgsw]	[µmol/kgsw]	[]	[]	[]	[]	[]	[]	[]	[]	[ppm]	[ppm]	[µmol/kgsw]	[µmol/kgsw]	[µmol/kgsw]	[µmol/kgsw]
0	0	2413.01	3.5	2086.59	16.9031	8.22558	0.02	36	0.1	7.275	0.436719	4.78796	0.286592	238.688	15.2022	2413.57	3.5	2098.11	16.2968	8.18233	0.02	36.1	0.1	6.79205	0.412403	4.47069	0.270669	271.512	17.0121	0	0	2417.88	3.5	2105.16	16.8395	8.21781	0.02	36.3	0.1	7.21428	0.43336	4.74979	0.284423	244.109	15.5383		3.5	2091.05	17.1754
0	600	2480.97	3.5	2094.95	17.7845	8.25807	0.02	36.2	0.1	7.89282	0.469447	5.19589	0.308146	222.238	14.339	2610.69	3.5	2095.83	20.4677	8.41533	0.02	36.1	0.1	10.4696	0.594842	6.89133	0.390404	143.126	9.84307	0	600	2514.66	3.5	2097.36	19.5351	8.38407	0.02	36.2	0.1	9.63656	0.552264	6.34381	0.36246	151.883	10.3326		3.5	2102.5	21.1548
0	1200	2610.32	3.5	2088.75	19.9048	8.36333	0.02	36.1	0.1	9.73814	0.56217	6.40987	0.368962	169.147	11.3758	2784.42	3.5	2099.2	22.7019	8.59558	0.02	36	0.1	14.0354	0.754823	9.23727	0.495335	83.7961	6.21797	0	1200	2556.22	3.5	2102.89	20.366	8.44507	0.02	36.2	0.1	10.6516	0.599254	7.01204	0.39325	126.766	8.85793		3.5	2105.75	22.6677
0	1800	2645.33	3.5	2069.29	21.1847	8.47584	0.02	35.9	0.1	11.4944	0.641416	7.56389	0.420862	119.316	8.4123	2973.68	3.5	2147.21	23.8439	8.71633	0.02	36.1	0.1	17.1074	0.888043	11.2605	0.582827	58.4753	4.56168	0	1800	2618.93	3.5	2108.7	21.0944	8.48402	0.02	36.6	0.1	11.5079	0.639282	7.57927	0.41957	113.722	8.11479		3.5	2113.15	23.3452
0	2100	2676.4	3.5	2091.41	21.4983	8.48858	0.02	36	0.1	11.8338	0.65763	7.78829	0.431557	115.644	8.19974	3040.51	3.5	2108.8	23.5076	8.82158	0.02	36	0.1	19.2654	0.972594	12.6793	0.638233	40.6234	3.30443	0	2100	2580.74	3.5	2098.45	20.5463	8.44733	0.02	36.1	0.1	10.791	0.60694	7.10291	0.398294	127.307	8.88921		3.5	2117.1	23.6612
0	2400	2728.26	3.5	2097.11	22.0993	8.52833	0.02	36.1	0.1	12.694	0.696673	8.35546	0.457236	103.13	7.43971	3130.17	3.5	2114.34	24.0229	8.83033	0.02	36.1	0.1	20.0359	1.00934	13.1881	0.662428	40.5132	3.30523	0	2400	2746.6	3.5	2104.37	22.4634	8.63807	0.02	36.2	0.1	14.4828	0.768441	9.53409	0.504335	70.8659	5.37069		3.5	2117.1	23.5859
0	34288	3934.2	3.5	2123.05	30.6179	8.72033	0.02	36.1	0.1	23.2869	1.21135	15.328	0.795017	78.1447	6.05723	4231.1	3.5	2146.81	31.6856	8.82358	0.02	36	0.1	27.7027	1.40237	18.2322	0.920264	57.8789	4.66914	0	34288	3940	3.5	2138.52	18.5903	9.37707	0.02	36.2	0.1	34.2925	1.60151	22.5749	1.0509	5.58193	0.538676		3.5	2144.54	19.0951
1	0	2428.36	3.5	2090.52	16.9391	8.21781	0.02	36.3	0.1	7.24743	0.435662	4.77162	0.286004	245.231	15.5891	2431.17	3.5	2088.85	16.8965	8.21381	0.02	36.3	0.1	7.21025	0.433909	4.74714	0.284853	248.509	15.7721	1	0	2412.82	3.5	2109.6						6.01533		3.96179		336.318			3.5	2142.61
1	600	2502.87	3.5	2012.14	20.2913	8.48033	0.02	36.1	0.1	10.8914	0.605964	7.16897	0.397703	110.375	7.82148	2854.99	3.5	2083.77	23.0002	8.71833	0.02	36.1	0.1	16.3865	0.849674	10.786	0.557645	55.4975	4.33916	1	600	2704.86	3.5	2063.82						12.1517		8.00329		111.799			3.5	2130.22
1	1200	2494.44	3.5	1837.93	20.7062	8.63407	0.02	36.2	0.1	12.9649	0.687486	8.53489	0.451258	64.6183	4.90152	2923.51	3.5	1881.98	21.2101	8.94433	0.02	36.1	0.1	20.1864	0.990302	13.2872	0.649929	24.1461	2.06153	1	1200	2746.23	3.5	1979.93						14.2797		9.40485		73.7461			3.5	1807.76
1	1800	2745.29	3.5	1869.4	21.7394	8.79307	0.02	36.2	0.1	16.7747	0.851581	11.0429	0.558963	40.2015	3.24778	2793.21	3.5	1775.3	20.6656	8.92181	0.02	36.3	0.1	18.8623	0.928885	12.4187	0.609771	24.9452	2.11768	1	1800	2778.8	3.5	1898.43						16.1517		10.6378		50.0711			3.5	1431.17
1	2100	2751.84	3.5	1878.19	21.3352	8.84284	0.02	35.9	0.1	17.5315	0.879621	11.5366	0.577145	33.5763	2.76268	2529.82	3.5	1423.38	16.4579	9.11381	0.02	36.3	0.1	18.6971	0.891047	12.3099	0.584922	10.2133	0.929388	1	2100	2780.11	3.5	1863.7						16.7051		11.0023		43.6499			3.5	1394.09
1	2400	2804.45	3.5	1829.27	20.1554	8.96481	0.02	36.3	0.1	19.4886	0.951504	12.831	0.624617	21.1433	1.82279	2497.25	3.5	1381.16	14.9333	9.21958	0.02	36	0.1	19.203	0.905347	12.6382	0.59408	6.4769	0.608093	1	2400	2857.42	3.5	1826.94						18.6316		12.271		31.1223			3.5	1477.52
1	34288	1804.61	3.5	804.77	10.5448	9.47155	0.02	36.4	0.1	12.8946	0.608643	8.49062	0.399568	1.35397	0.140356	2079.23	3.5	878.01	11.2076	9.52707	0.02	36.2	0.1	15.7257	0.7388	10.3523	0.4849	1.28291	0.132947	1	34288	1880.8	3.5	838.4						13.646		8.98745		2.2588			3.5	631.12
4	0	2426.49	3.5	2091.85	17.2423	8.23981	0.02	36.3	0.1	7.49718	0.447932	4.93604	0.294058	229.239	14.7007	2428.36	3.5	2102.83	17.3956	8.24855	0.02	36.4	0.1	7.6105	0.453461	5.01125	0.297723	223.16	14.3674	4	0	2432.29	3.5	2122.41	16.3433	8.17455	0.02	36.4	0.1	6.77451	0.41189	4.46078	0.27043	279.307	17.4673		3.5	2114.53	14.4605
4	600	2389.05	3.5	1851.65	19.912	8.56081	0.02	36.3	0.1	11.4055	0.617876	7.50921	0.405618	79.5251	5.85578	2573.25	3.5	1902.73	21.1543	8.68707	0.02	36.2	0.1	14.1637	0.739717	9.32402	0.48554	55.3046	4.28627	4	600	2536.56	3.5	1576.94	20.7638	8.52081	0.02	36.3	0.1	11.6227	0.638324	7.65226	0.418992	97.4315	7.03863		3.5	1985.48	22.3481
4	1200	1892.22	3.5	1338.49	16.3309	8.71981	0.02	36.3	0.1	10.2784	0.528938	6.76719	0.347227	34.4602	2.75119	1977.4	3.5	1339.57	16.5271	8.79255	0.02	36.4	0.1	11.4938	0.580551	7.56827	0.381151	27.5212	2.25987	4	1200	2253.7	3.5	1891.66	18.7918	8.50381	0.02	36.3	0.1	9.99911	0.550736	6.58328	0.361585	90.6468	6.51932		3.5	1336.94	16.8657
4	1800	1985.63	3.5	1247.8	15.63	8.91281	0.02	36.3	0.1	12.5783	0.618438	8.28139	0.405973	17.3386	1.49121	1928.35	3.5	1511.24	16.5696	8.49481	0.02	36.3	0.1	8.31594	0.457976	5.47511	0.300648	78.5783	5.67772	4	1800	1986.76	3.5	1249.23	17.0442	8.70155	0.02	36.4	0.1	10.6999	0.554071	7.0455	0.363726	38.9568	3.0832		3.5	837.84	13.1306
4	2100	1886.61	3.5	1135.54	14.4354	8.97555	0.02	36.4	0.1	12.2446	0.594702	8.06266	0.390434	12.6226	1.11501	1277.64	3.5	630.91	9.93925	9.14381	0.02	36.3	0.1	7.71328	0.36967	5.07832	0.242657	3.6697	0.357056	4	2100	1893.72	3.5	1154.33	16.5312	8.65381	0.02	36.3	0.1	9.67971	0.507561	6.37299	0.333195	43.9798	3.41289		3.5	681.22	12.6948
4	2400	1783.46	3.5	997.3	12.7669	9.09281	0.02	36.3	0.1	12.0353	0.574972	7.9239	0.377431	7.24184	0.668462	1207.82	3.5	539.63	9.29368	9.21981	0.02	36.3	0.1	7.12219	0.34255	4.68916	0.224852	2.38784	0.240974	4	2400	1740.03	3.5	948.78	14.191	8.90181	0.02	36.3	0.1	10.6323	0.523219	7.00014	0.343465	15.4176	1.33203
4	34288	1004.14	3.5	335.21	8.44138	9.46281	0.02	36.3	0.1	4.69836	0.250627	3.09334	0.164504	0.514443	0.0613837	1182.36	3.5	362.17	9.14888	9.55481	0.02	36.3	0.1	6.19477	0.320428	4.07856	0.210322	0.444034	0.052336	4	34288	1066.67	3.5	368.86	8.69066	9.24007	0.02	36.2	0.1	5.80486	0.283391	3.82137	0.186016	1.77573	0.184639		3.5	373.49	9.05686
Raw data experiment: IV
Description:
Solid Mg(OH)2 for alkalinisation, Non-CO2-equilibrated, stability of alkalinity experiments of 2 types magnesium hydroxide- with TA enhanced seawater 0-34288 µmol/kgsw, runtime 4 days, biotic treatments 55µm filterd, abiotic 0.2 µm filtered
Errors determined by uncertainty calculations in CO2SYS_v2.5, if replicates are available resulting deviations were included
Figures: 5 and 6
[truncated: 10 more columns]

## Sheet: Exp. V
runtime_main	TA_rep1	TA_rep2	TA_rep3	TA_average	TA_average_error	TA_control	TA_control_error	Omega(ar)	Omega(ar)_error	runtime_pH	pH	pH_error
[hours]	[µmol/kgsw]	[µmol/kgsw]	[µmol/kgsw]	[µmol/kgsw]	[µmol/kgsw]	[µmol/kgsw]	[µmol/kgsw]	[]	[]	[hours]	[]	[]
0	2297	2297	2297	2297	0	2297	5.2	3.99962	0.251891	0	8.18407	0.02
0.25	836.3	825.7	835.4	832.47	4.8	2310.12	5.2	3.79328	0.549519	0.001	10.1251	0.02
0.5	1054.2	933.8	928.6	972.2	58	2307.2	5.2	6.81037	0.649287	0.0833333	10.3911	0.02
1	1222.6	1239.7	1177.7	1213.33	26.1	2260.33	5.2	12.8128	0.355972	0.166667	10.3871	0.02
2	1130.7	1183	1141.5	1151.73	22.5	2320.8	5.2	12.5166	0.281797	0.25	10.3751	0.02
4	1069.7	1163.2	1098.6	1110.51	39.1	2321.36	5.2	12.0064	0.358196	0.333333	10.3611	0.02
8	996	968.8	964.3	976.375	14	2312.96	5.2	9.89506	0.196156	0.416667	10.3461	0.02
16	978.7	961.7	972.2	970.86	7	2321.55	5.2	10.0666	0.168795	0.5	10.3311	0.02
24	968.5	968.9	1009.9	982.461	19.4	2331.56	5.2	10.4627	0.214691	0.583333	10.3151	0.02
48	1037.2	1094.1	1025.5	1052.28	30	2326.03	5.2	12.1657	0.279196	0.666667	10.2991	0.02
96	1362.8	1391.5	1410.4	1388.26	19.6	2341.3	5.2	2.59636	0.142076	0.75	10.2801	0.02
192	1300.2	1311.9	1337.7	1316.59	15.7	2365.08	5.2	2.47258	0.134601	0.833333	10.2541	0.02
240	1211.1	1209.5	1223.3	1214.64	6.2	2380.09	5.2	2.22214	0.119946	0.916667	10.2141	0.02
										1	10.1581	0.02
										1.08333	10.1091	0.02
										1.16667	10.0791	0.02
										1.25	10.0601	0.02
										1.33333	10.0481	0.02
										1.41667	10.0371	0.02
										1.5	10.0291	0.02
										1.58333	10.0221	0.02
										1.66667	10.0161	0.02
										1.75	10.0101	0.02
										1.83333	10.0051	0.02
										1.91667	10.0011	0.02
										2	9.99707	0.02
										2.08333	9.99407	0.02
										2.16667	9.99107	0.02
Raw data experiment: V										2.25	9.98807	0.02
										2.33333	9.98507	0.02
Description:										2.41667	9.98207	0.02
Alkalinity recovery after mineral precipitation in seawater (2297 µmol/kgsw), non-CO2-equilibrated treatments, runtime 10 days, abiotic 0.2 µm filtered										2.5	9.97907	0.02
Errors determined by uncertainty calculations in CO2SYS_v2.5, if replicates are available resulting deviations were included										2.58333	9.97607	0.02
										2.66667	9.97407	0.02
Figure: 7										2.75	9.97107	0.02
										2.83333	9.96807	0.02
										2.91667	9.96607	0.02
										3	9.96307	0.02
										3.08333	9.96007	0.02
										3.16667	9.95707	0.02
										3.25	9.95507	0.02
										3.33333	9.95307	0.02
										3.41667	9.95107	0.02
										3.5	9.94807	0.02
										3.58333	9.94607	0.02
										3.66667	9.94307	0.02
										3.75	9.94007	0.02
										3.83333	9.93807	0.02
										3.91667	9.93507	0.02
										4	9.93307	0.02
										4.08333	9.93107	0.02
										4.16667	9.92807	0.02
										4.25	9.92507	0.02
										4.33333	9.92307	0.02
										4.41667	9.92007	0.02
										4.5	9.91807	0.02
										4.58333	9.91507	0.02
										4.66667	9.91207	0.02
										4.75	9.90907	0.02
										4.83333	9.90607	0.02
										4.91667	9.90307	0.02
										5	9.90007	0.02
										5.08333	9.89807	0.02
										5.16667	9.89507	0.02
										5.25	9.89207	0.02
										5.33333	9.89007	0.02
										5.41667	9.88807	0.02
										5.5	9.88507	0.02
										5.58333	9.88307	0.02
										5.66667	9.88007	0.02
										5.75	9.87707	0.02
										5.83333	9.87407	0.02
										5.91667	9.87107	0.02
										6	9.86807	0.02
										6.08333	9.86507	0.02
										6.16667	9.86307	0.02
										6.25	9.85907	0.02
										6.33333	9.85607	0.02
										6.41667	9.85307	0.02
										6.5	9.85107	0.02
										6.58333	9.84707	0.02
										6.66667	9.84407	0.02
										6.75	9.84207	0.02
										6.83333	9.84007	0.02
										6.91667	9.83707	0.02
										7	9.83507	0.02
										7.08333	9.83207	0.02
										7.16667	9.83007	0.02
										7.25	9.82807	0.02
										7.33333	9.82607	0.02
										7.41667	9.82407	0.02
										7.5	9.82307	0.02
										7.58333	9.82107	0.02
										7.66667	9.82007	0.02
										7.75	9.81807	0.02
										7.83333	9.81707	0.02
										7.91667	9.81507	0.02
										8	9.81407	0.02
										8.08333	9.81207	0.02
										8.16667	9.81107	0.02
										8.25	9.81007	0.02
										8.33333	9.80807	0.02
										8.41667	9.80807	0.02
										8.5	9.80607	0.02
										8.58333	9.80507	0.02
										8.66667	9.80407	0.02
										8.75	9.80307	0.02
										8.83333	9.80307	0.02
										8.91667	9.80107	0.02
										9	9.80107	0.02
										9.08333	9.80007	0.02
										9.16667	9.80007	0.02
										9.25	9.79807	0.02
										9.33333	9.79807	0.02
										9.41667	9.79707	0.02
										9.5	9.79607	0.02
										9.58333	9.79607	0.02
										9.66667	9.79507	0.02
										9.75	9.79307	0.02
										9.83333	9.79207	0.02
										9.91667	9.79107	0.02
										10	9.79007	0.02
										10.0833	9.78907	0.02
										10.1667	9.78807	0.02
										10.25	9.78807	0.02
										10.3333	9.78707	0.02
										10.4167	9.78607	0.02
										10.5	9.78507	0.02
										10.5833	9.78407	0.02
										10.6667	9.78307	0.02
										10.75	9.78207	0.02
										10.8333	9.78207	0.02
										10.9167	9.78107	0.02
										11	9.78007	0.02
										11.0833	9.77807	0.02
										11.1667	9.77807	0.02
										11.25	9.77607	0.02
										11.3333	9.77507	0.02
										11.4167	9.77407	0.02
										11.5	9.77407	0.02
										11.5833	9.77207	0.02
										11.6667	9.77207	0.02
										11.75	9.77107	0.02
										11.8333	9.77007	0.02
										11.9167	9.76807	0.02
										12	9.76707	0.02
										12.0833	9.76707	0.02
										12.1667	9.76607	0.02
										12.25	9.76607	0.02
										12.3333	9.76507	0.02
										12.4167	9.76507	0.02
										12.5	9.76507	0.02
										12.5833	9.76407	0.02
										12.6667	9.76407	0.02
										12.75	9.76307	0.02
										12.8333	9.76107	0.02
										12.9167	9.76107	0.02
										13	9.76007	0.02
										13.0833	9.76007	0.02
										13.1667	9.75907	0.02
										13.25	9.75807	0.02
										13.3333	9.75807	0.02
										13.4167	9.75707	0.02
										13.5	9.75607	0.02
										13.5833	9.75507	0.02
										13.6667	9.75407	0.02
										13.75	9.75307	0.02
										13.8333	9.75207	0.02
										13.9167	9.75107	0.02
										14	9.75007	0.02
										14.0833	9.75007	0.02
										14.1667	9.74907	0.02
										14.25	9.74807	0.02
										14.3333	9.74807	0.02
										14.4167	9.74807	0.02
										14.5	9.74607	0.02
										14.5833	9.74607	0.02
										14.6667	9.74507	0.02
										14.75	9.74407	0.02
										14.8333	9.74407	0.02
										14.9167	9.74307	0.02
										15	9.74207	0.02
										15.0833	9.74207	0.02
										15.1667	9.74107	0.02
										15.25	9.74007	0.02
										15.3333	9.73907	0.02
										15.4167	9.73807	0.02
										15.5	9.73707	0.02
										15.5833	9.73707	0.02
										15.6667	9.73707	0.02
										15.75	9.73707	0.02
										15.8333	9.73607	0.02
										15.9167	9.73607	0.02
										16	9.73507	0.02
										16.0833	9.73307	0.02
										16.1667	9.73307	0.02
										16.25	9.73207	0.02
										16.3333	9.73107	0.02
										16.4167	9.73107	0.02
										16.5	9.73007	0.02
										16.5833	9.72907	0.02
										16.6667	9.72907	0.02
										16.75	9.72707	0.02
										16.8333	9.72707	0.02
										16.9167	9.72607	0.02
										17	9.72507	0.02
										17.0833	9.72507	0.02
										17.1667	9.72407	0.02
										17.25	9.72307	0.02
										17.3333	9.72307	0.02
										17.4167	9.72207	0.02
										17.5	9.72107	0.02
										17.5833	9.72107	0.02
										17.6667	9.72007	0.02
										17.75	9.71907	0.02
										17.8333	9.71907	0.02
										17.9167	9.71807	0.02
										18	9.71807	0.02
										18.0833	9.71707	0.02
										18.1667	9.71707	0.02
										18.25	9.71607	0.02
										18.3333	9.71507	0.02
										18.4167	9.71507	0.02
										18.5	9.71407	0.02
										18.5833	9.71307	0.02
										18.6667	9.71307	0.02
										18.75	9.71207	0.02
										18.8333	9.71207	0.02
										18.9167	9.71107	0.02
										19	9.71107	0.02
										19.0833	9.71107	0.02
										19.1667	9.71107	0.02
										19.25	9.71107	0.02
										19.3333	9.71007	0.02
										19.4167	9.71007	0.02
										19.5	9.70907	0.02
										19.5833	9.70907	0.02
										19.6667	9.70807	0.02
										19.75	9.70807	0.02
										19.8333	9.70707	0.02
										19.9167	9.70707	0.02
										20	9.70607	0.02
										20.0833	9.70607	0.02
										20.1667	9.70507	0.02
										20.25	9.70507	0.02
										20.3333	9.70407	0.02
										20.4167	9.70407	0.02
										20.5	9.70307	0.02
										20.5833	9.70207	0.02
										20.6667	9.70107	0.02
										20.75	9.70007	0.02
										20.8333	9.70007	0.02
										20.9167	9.69807	0.02
										21	9.69807	0.02
										21.0833	9.69707	0.02
										21.1667	9.69607	0.02
										21.25	9.69507	0.02
										21.3333	9.69507	0.02
										21.4167	9.69407	0.02
										21.5	9.69307	0.02
										21.5833	9.69307	0.02
										21.6667	9.69207	0.02
										21.75	9.69107	0.02
										21.8333	9.69107	0.02
										21.9167	9.69107	0.02
										22	9.69007	0.02
										22.0833	9.69007	0.02
										22.1667	9.68907	0.02
										22.25	9.68907	0.02
										22.3333	9.68907	0.02
										22.4167	9.68807	0.02
										22.5	9.68807	0.02
										22.5833	9.68807	0.02
										22.6667	9.68807	0.02
										22.75	9.68807	0.02
										22.8333	9.68707	0.02
										22.9167	9.68707	0.02
										23	9.68707	0.02
										23.0833	9.68607	0.02
										23.1667	9.68607	0.02
										23.25	9.68507	0.02
										23.3333	9.68507	0.02
										23.4167	9.68407	0.02
										23.5	9.68407	0.02
										23.5833	9.68407	0.02
										23.6667	9.68407	0.02
										23.75	9.68307	0.02
										23.8333	9.68307	0.02
										23.9167	9.68207	0.02
										24	9.68207	0.02
										24.0833	9.68107	0.02
										24.1667	9.68107	0.02
										24.25	9.68007	0.02
										24.3333	9.68007	0.02
										24.4167	9.68007	0.02
										24.5	9.67907	0.02
										24.5833	9.67907	0.02
										24.6667	9.67907	0.02
										24.75	9.67807	0.02
										24.8333	9.67707	0.02
										24.9167	9.67707	0.02
										25	9.67707	0.02
										25.0833	9.67607	0.02
										25.1667	9.67607	0.02
										25.25	9.67507	0.02
										25.3333	9.67507	0.02
										25.4167	9.67507	0.02
										25.5	9.67307	0.02
										25.5833	9.67307	0.02
										25.6667	9.67307	0.02
										25.75	9.67207	0.02
										25.8333	9.67207	0.02
										25.9167	9.67207	0.02
										26	9.67207	0.02
										26.0833	9.67207	0.02
										26.1667	9.67207	0.02
										26.25	9.67107	0.02
										26.3333	9.67107	0.02
										26.4167	9.67007	0.02
										26.5	9.67007	0.02
										26.5833	9.66907	0.02
										26.6667	9.66907	0.02
										26.75	9.66907	0.02
										26.8333	9.66907	0.02
										26.9167	9.66907	0.02
										27	9.66807	0.02
										27.0833	9.66707	0.02
										27.1667	9.66707	0.02
										27.25	9.66607	0.02
										27.3333	9.66607	0.02
										27.4167	9.66507	0.02
										27.5	9.66507	0.02
										27.5833	9.66507	0.02
										27.6667	9.66507	0.02
										27.75	9.66407	0.02
										27.8333	9.66407	0.02
										27.9167	9.66307	0.02
										28	9.66307	0.02
										28.0833	9.66207	0.02
										28.1667	9.66207	0.02
										28.25	9.66207	0.02
										28.3333	9.66107	0.02
										28.4167	9.66107	0.02
										28.5	9.66107	0.02
										28.5833	9.66007	0.02
										28.6667	9.66007	0.02
										28.75	9.65907	0.02
										28.8333	9.65807	0.02
										28.9167	9.65807	0.02
										29	9.65807	0.02
										29.0833	9.65807	0.02
										29.1667	9.65707	0.02
										29.25	9.65707	0.02
										29.3333	9.65707	0.02
										29.4167	9.65707	0.02
										29.5	9.65707	0.02
										29.5833	9.65707	0.02
										29.6667	9.65707	0.02
										29.75	9.65607	0.02
										29.8333	9.65607	0.02
										29.9167	9.65607	0.02
										30	9.65507	0.02
										30.0833	9.65407	0.02
										30.1667	9.65407	0.02
										30.25	9.65307	0.02
										30.3333	9.65207	0.02
										30.4167	9.65107	0.02
										30.5	9.65107	0.02
										30.5833	9.65007	0.02
										30.6667	9.65007	0.02
										30.75	9.64907	0.02
										30.8333	9.64907	0.02
										30.9167	9.64907	0.02
										31	9.64807	0.02
										31.0833	9.64707	0.02
										31.1667	9.64607	0.02
										31.25	9.64607	0.02
										31.3333	9.64607	0.02
										31.4167	9.64607	0.02
										31.5	9.64507	0.02
										31.5833	9.64407	0.02
										31.6667	9.64407	0.02
										31.75	9.64407	0.02
										31.8333	9.64407	0.02
										31.9167	9.64307	0.02
										32	9.64207	0.02
										32.0833	9.64207	0.02
										32.1667	9.64107	0.02
										32.25	9.64107	0.02
										32.3333	9.64107	0.02
										32.4167	9.64107	0.02
										32.5	9.64107	0.02
										32.5833	9.64107	0.02
										32.6667	9.64007	0.02
										32.75	9.64007	0.02
										32.8333	9.64007	0.02
										32.9167	9.64007	0.02
										33	9.64007	0.02
										33.0833	9.63907	0.02
										33.1667	9.63907	0.02
										33.25	9.63907	0.02
										33.3333	9.63807	0.02
										33.4167	9.63807	0.02
										33.5	9.63807	0.02
										33.5833	9.63707	0.02
										33.6667	9.63607	0.02
										33.75	9.63607	0.02
										33.8333	9.63607	0.02
										33.9167	9.63507	0.02
										34	9.63507	0.02
										34.0833	9.63407	0.02
										34.1667	9.63407	0.02
										34.25	9.63407	0.02
										34.3333	9.63407	0.02
										34.4167	9.63307	0.02
										34.5	9.63207	0.02
										34.5833	9.63207	0.02
										34.6667	9.63207	0.02
										34.75	9.63107	0.02
										34.8333	9.63107	0.02
										34.9167	9.63007	0.02
										35	9.63007	0.02
										35.0833	9.62907	0.02
										35.1667	9.62807	0.02
										35.25	9.62807	0.02
										35.3333	9.62807	0.02
										35.4167	9.62707	0.02
										35.5	9.62607	0.02
										35.5833	9.62607	0.02
										35.6667	9.62607	0.02
										35.75	9.62607	0.02
										35.8333	9.62507	0.02
										35.9167	9.62407	0.02
										36	9.62407	0.02
										36.0833	9.62407	0.02
										36.1667	9.62407	0.02
										36.25	9.62507	0.02
										36.3333	9.62507	0.02
										36.4167	9.62507	0.02
										36.5	9.62407	0.02
										36.5833	9.62407	0.02
										36.6667	9.62307	0.02
										36.75	9.62307	0.02
										36.8333	9.62207	0.02
										36.9167	9.62207	0.02
										37	9.62107	0.02
										37.0833	9.62107	0.02
										37.1667	9.62107	0.02
										37.25	9.62107	0.02
										37.3333	9.62107	0.02
										37.4167	9.62007	0.02
										37.5	9.62007	0.02
										37.5833	9.61907	0.02
										37.6667	9.61807	0.02
										37.75	9.61807	0.02
										37.8333	9.61707	0.02
										37.9167	9.61707	0.02
										38	9.61707	0.02
										38.0833	9.61707	0.02
										38.1667	9.61607	0.02
										38.25	9.61607	0.02
										38.3333	9.61607	0.02
										38.4167	9.61607	0.02
										38.5	9.61507	0.02
										38.5833	9.61407	0.02
										38.6667	9.61307	0.02
										38.75	9.61307	0.02
										38.8333	9.61307	0.02
										38.9167	9.61307	0.02
										39	9.61207	0.02
										39.0833	9.61207	0.02
										39.1667	9.61207	0.02
										39.25	9.61207	0.02
										39.3333	9.61207	0.02
										39.4167	9.61207	0.02
										39.5	9.61207	0.02
										39.5833	9.61207	0.02
										39.6667	9.61207	0.02
										39.75	9.61207	0.02
										39.8333	9.61107	0.02
										39.9167	9.61007	0.02
										40	9.60907	0.02
										40.0833	9.60907	0.02
										40.1667	9.60807	0.02
										40.25	9.60807	0.02
										40.3333	9.60707	0.02
										40.4167	9.60707	0.02
										40.5	9.60607	0.02
										40.5833	9.60607	0.02
										40.6667	9.60507	0.02
										40.75	9.60407	0.02
										40.8333	9.60407	0.02
										40.9167	9.60407	0.02
										41	9.60407	0.02
										41.0833	9.60307	0.02
										41.1667	9.60307	0.02
										41.25	9.60207	0.02
										41.3333	9.60207	0.02
										41.4167	9.60107	0.02
										41.5	9.60007	0.02
										41.5833	9.60007	0.02
										41.6667	9.60007	0.02
										41.75	9.60007	0.02
										41.8333	9.59907	0.02
										41.9167	9.59807	0.02
										42	9.59807	0.02
										42.0833	9.59807	0.02
										42.1667	9.59807	0.02
										42.25	9.59707	0.02
										42.3333	9.59607	0.02
										42.4167	9.59607	0.02
										42.5	9.59607	0.02
										42.5833	9.59507	0.02
										42.6667	9.59507	0.02
										42.75	9.59507	0.02
										42.8333	9.59507	0.02
										42.9167	9.59407	0.02
										43	9.59507	0.02
										43.0833	9.59507	0.02
										43.1667	9.59407	0.02
										43.25	9.59407	0.02
										43.3333	9.59407	0.02
										43.4167	9.59307	0.02
										43.5	9.59307	0.02
										43.5833	9.59307	0.02
										43.6667	9.59207	0.02
										43.75	9.59207	0.02
										43.8333	9.59207	0.02
										43.9167	9.59107	0.02
										44	9.59007	0.02
										44.0833	9.58907	0.02
										44.1667	9.58907	0.02
										44.25	9.58907	0.02
										44.3333	9.58907	0.02
										44.4167	9.58807	0.02
										44.5	9.58707	0.02
										44.5833	9.58707	0.02
										44.6667	9.58607	0.02
										44.75	9.58507	0.02
										44.8333	9.58407	0.02
										44.9167	9.58407	0.02
										45	9.58307	0.02
										45.0833	9.58307	0.02
										45.1667	9.58207	0.02
										45.25	9.58207	0.02
										45.3333	9.58207	0.02
										45.4167	9.58107	0.02
										45.5	9.58007	0.02
										45.5833	9.58007	0.02
										45.6667	9.58007	0.02
										45.75	9.58007	0.02
										45.8333	9.57907	0.02
										45.9167	9.57907	0.02
										46	9.57907	0.02
										46.0833	9.57807	0.02
										46.1667	9.57807	0.02
										46.25	9.57807	0.02
										46.3333	9.57807	0.02
										46.4167	9.57807	0.02
										46.5	9.57807	0.02
										46.5833	9.57707	0.02
										46.6667	9.57707	0.02
										46.75	9.57607	0.02
										46.8333	9.57607	0.02
										46.9167	9.57607	0.02
										47	9.57507	0.02
										47.0833	9.57407	0.02
										47.1667	9.57407	0.02
										47.25	9.57307	0.02
										47.3333	9.57207	0.02
										47.4167	9.57207	0.02
										47.5	9.57207	0.02
										47.5833	9.57107	0.02
										47.6667	9.57107	0.02
										47.75	9.57007	0.02
										47.8333	9.57007	0.02
										47.9167	9.56907	0.02
										48	9.56807	0.02
										48.0833	9.56807	0.02
										48.1667	9.56707	0.02
										48.25	9.56707	0.02
										48.3333	9.56607	0.02
										48.4167	9.56607	0.02
										48.5	9.56607	0.02
										48.5833	9.56507	0.02
										48.6667	9.56407	0.02
										48.75	9.56407	0.02
										48.8333	9.56307	0.02
										48.9167	9.56207	0.02
										49	9.56207	0.02
										49.0833	9.56207	0.02
										49.1667	9.56107	0.02
										49.25	9.56007	0.02
										49.3333	9.56007	0.02
										49.4167	9.55907	0.02
										49.5	9.55807	0.02
										49.5833	9.55807	0.02
										49.6667	9.55807	0.02
										49.75	9.55707	0.02
										49.8333	9.55707	0.02
										49.9167	9.55707	0.02
										50	9.55607	0.02
										50.0833	9.55507	0.02
										50.1667	9.55507	0.02
										50.25	9.55407	0.02
										50.3333	9.55307	0.02
										50.4167	9.55307	0.02
										50.5	9.55207	0.02
										50.5833	9.55107	0.02
										50.6667	9.55007	0.02
										50.75	9.55007	0.02
										50.8333	9.54907	0.02
										50.9167	9.54907	0.02
										51	9.54807	0.02
										51.0833	9.54707	0.02
										51.1667	9.54607	0.02
										51.25	9.54607	0.02
										51.3333	9.54407	0.02
										51.4167	9.54407	0.02
										51.5	9.54307	0.02
										51.5833	9.54207	0.02
										51.6667	9.54207	0.02
										51.75	9.54107	0.02
										51.8333	9.54007	0.02
										51.9167	9.54007	0.02
										52	9.53807	0.02
										52.0833	9.53807	0.02
										52.1667	9.53707	0.02
										52.25	9.53607	0.02
										52.3333	9.53607	0.02
										52.4167	9.53507	0.02
										52.5	9.53507	0.02
										52.5833	9.53407	0.02
										52.6667	9.53307	0.02
										52.75	9.53207	0.02
										52.8333	9.53107	0.02
										52.9167	9.53007	0.02
										53	9.52907	0.02
										53.0833	9.52907	0.02
										53.1667	9.52807	0.02
										53.25	9.52807	0.02
										53.3333	9.52707	0.02
										53.4167	9.52607	0.02
										53.5	9.52607	0.02
										53.5833	9.52407	0.02
										53.6667	9.52307	0.02
										53.75	9.52207	0.02
										53.8333	9.52107	0.02
										53.9167	9.52007	0.02
										54	9.51907	0.02
										54.0833	9.51807	0.02
										54.1667	9.51607	0.02
										54.25	9.51507	0.02
										54.3333	9.51307	0.02
										54.4167	9.51107	0.02
										54.5	9.51007	0.02
										54.5833	9.50907	0.02
										54.6667	9.50807	0.02
										54.75	9.50607	0.02
										54.8333	9.50507	0.02
										54.9167	9.50407	0.02
										55	9.50207	0.02
										55.0833	9.50107	0.02
										55.1667	9.49907	0.02
										55.25	9.49707	0.02
										55.3333	9.49607	0.02
										55.4167	9.49507	0.02
										55.5	9.49307	0.02
										55.5833	9.49107	0.02
										55.6667	9.48907	0.02
										55.75	9.48707	0.02
										55.8333	9.48607	0.02
										55.9167	9.48407	0.02
										56	9.48207	0.02
										56.0833	9.48007	0.02
										56.1667	9.47807	0.02
										56.25	9.47607	0.02
										56.3333	9.47407	0.02
										56.4167	9.47207	0.02
										56.5	9.47007	0.02
										56.5833	9.46807	0.02
										56.6667	9.46507	0.02
										56.75	9.46307	0.02
										56.8333	9.46007	0.02
										56.9167	9.45807	0.02
										57	9.45407	0.02
										57.0833	9.45207	0.02
										57.1667	9.44807	0.02
										57.25	9.44507	0.02
										57.3333	9.44107	0.02
										57.4167	9.43707	0.02
										57.5	9.43407	0.02
										57.5833	9.42907	0.02
										57.6667	9.42507	0.02
										57.75	9.42007	0.02
										57.8333	9.41607	0.02
										57.9167	9.41007	0.02
										58	9.40507	0.02
										58.0833	9.40007	0.02
										58.1667	9.39407	0.02
										58.25	9.38807	0.02
										58.3333	9.38107	0.02
										58.4167	9.37507	0.02
										58.5	9.36707	0.02
										58.5833	9.36007	0.02
										58.6667	9.35207	0.02
										58.75	9.34407	0.02
										58.8333	9.33507	0.02
										58.9167	9.32507	0.02
										59	9.31507	0.02
										59.0833	9.30507	0.02
										59.1667	9.29407	0.02
										59.25	9.28307	0.02
										59.3333	9.27107	0.02
										59.4167	9.25907	0.02
										59.5	9.24607	0.02
										59.5833	9.23307	0.02
										59.6667	9.21907	0.02
										59.75	9.20507	0.02
										59.8333	9.19007	0.02
										59.9167	9.17607	0.02
										60	9.16007	0.02
										60.0833	9.14507	0.02
										60.1667	9.12907	0.02
										60.25	9.11307	0.02
										60.3333	9.09707	0.02
										60.4167	9.08207	0.02
										60.5	9.06507	0.02
										60.5833	9.04807	0.02
										60.6667	9.03207	0.02
										60.75	9.01607	0.02
										60.8333	9.00107	0.02
										60.9167	8.98407	0.02
										61	8.96907	0.02
										61.0833	8.95307	0.02
										61.1667	8.93807	0.02
										61.25	8.92307	0.02
										61.3333	8.90807	0.02
										61.4167	8.89207	0.02
										61.5	8.87707	0.02
										61.5833	8.86207	0.02
										61.6667	8.84807	0.02
										61.75	8.83307	0.02
										61.8333	8.81907	0.02
										61.9167	8.80507	0.02
										62	8.79107	0.02
										62.0833	8.77707	0.02
										62.1667	8.76307	0.02
										62.25	8.75007	0.02
										62.3333	8.73607	0.02
										62.4167	8.72307	0.02
										62.5	8.71007	0.02
										62.5833	8.69807	0.02
										62.6667	8.68507	0.02
										62.75	8.67307	0.02
										62.8333	8.66107	0.02
										62.9167	8.64907	0.02
										63	8.63807	0.02
										63.0833	8.62707	0.02
										63.1667	8.61607	0.02
										63.25	8.60507	0.02
										63.3333	8.59507	0.02
										63.4167	8.58407	0.02
										63.5	8.57407	0.02
										63.5833	8.56407	0.02
										63.6667	8.55407	0.02
										63.75	8.54407	0.02
										63.8333	8.53507	0.02
										63.9167	8.52507	0.02
										64	8.51607	0.02
										64.0833	8.50707	0.02
										64.1667	8.49907	0.02
										64.25	8.49007	0.02
										64.3333	8.48107	0.02
										64.4167	8.47207	0.02
										64.5	8.46407	0.02
										64.5833	8.45507	0.02
										64.6667	8.44707	0.02
										64.75	8.43907	0.02
										64.8333	8.43107	0.02
										64.9167	8.42407	0.02
										65	8.41607	0.02
										65.0833	8.40907	0.02
										65.1667	8.40207	0.02
										65.25	8.39607	0.02
										65.3333	8.38907	0.02
										65.4167	8.38207	0.02
										65.5	8.37607	0.02
										65.5833	8.37007	0.02
										65.6667	8.36407	0.02
										65.75	8.35907	0.02
										65.8333	8.35307	0.02
										65.9167	8.34807	0.02
										66	8.34307	0.02
										66.0833	8.33807	0.02
										66.1667	8.33307	0.02
										66.25	8.32807	0.02
										66.3333	8.32307	0.02
										66.4167	8.31907	0.02
										66.5	8.31407	0.02
										66.5833	8.31107	0.02
										66.6667	8.30807	0.02
										66.75	8.30407	0.02
										66.8333	8.30007	0.02
										66.9167	8.29607	0.02
										67	8.29107	0.02
										67.0833	8.28707	0.02
										67.1667	8.28307	0.02
										67.25	8.28007	0.02
										67.3333	8.27607	0.02
										67.4167	8.27207	0.02
										67.5	8.26907	0.02
										67.5833	8.26607	0.02
										67.6667	8.26207	0.02
										67.75	8.25707	0.02
										67.8333	8.25407	0.02
										67.9167	8.25007	0.02
										68	8.24707	0.02
										68.0833	8.24507	0.02
										68.1667	8.24207	0.02
										68.25	8.24007	0.02
										68.3333	8.23707	0.02
										68.4167	8.23507	0.02
										68.5	8.23307	0.02
										68.5833	8.23107	0.02
										68.6667	8.22907	0.02
										68.75	8.22807	0.02
										68.8333	8.22507	0.02
										68.9167	8.22507	0.02
										69	8.22307	0.02
										69.0833	8.22107	0.02
										69.1667	8.21907	0.02
										69.25	8.21707	0.02
										69.3333	8.21607	0.02
										69.4167	8.21407	0.02
										69.5	8.21307	0.02
										69.5833	8.21107	0.02
										69.6667	8.21007	0.02
										69.75	8.21007	0.02
										69.8333	8.20907	0.02
										69.9167	8.20807	0.02
										70	8.20707	0.02
										70.0833	8.20607	0.02
										70.1667	8.20607	0.02
										70.25	8.20507	0.02
										70.3333	8.20407	0.02
										70.4167	8.20307	0.02
										70.5	8.20307	0.02
										70.5833	8.20107	0.02
										70.6667	8.20007	0.02
										70.75	8.19907	0.02
										70.8333	8.19807	0.02
										70.9167	8.19707	0.02
										71	8.19607	0.02
										71.0833	8.19507	0.02
										71.1667	8.19407	0.02
										71.25	8.19407	0.02
										71.3333	8.19307	0.02
										71.4167	8.19207	0.02
										71.5	8.19207	0.02
										71.5833	8.19107	0.02
										71.6667	8.19107	0.02
										71.75	8.19007	0.02
										71.8333	8.19007	0.02
										71.9167	8.18907	0.02
										72	8.18807	0.02
										72.0833	8.18807	0.02
										72.1667	8.18807	0.02
										72.25	8.18707	0.02
										72.3333	8.18707	0.02
										72.4167	8.18707	0.02
										72.5	8.18607	0.02
										72.5833	8.18507	0.02
										72.6667	8.18507	0.02
										72.75	8.18507	0.02
										72.8333	8.18407	0.02
										72.9167	8.18407	0.02
										73	8.18307	0.02
										73.0833	8.18307	0.02
										73.1667	8.18307	0.02
										73.25	8.18307	0.02
										73.3333	8.18207	0.02
										73.4167	8.18207	0.02
										73.5	8.18207	0.02
										73.5833	8.18207	0.02
										73.6667	8.18207	0.02
										73.75	8.18107	0.02
										73.8333	8.18107	0.02
										73.9167	8.18007	0.02
										74	8.18007	0.02
										74.0833	8.18007	0.02
										74.1667	8.17907	0.02
										74.25	8.17807	0.02
										74.3333	8.17807	0.02
										74.4167	8.17807	0.02
										74.5	8.17807	0.02
										74.5833	8.17807	0.02
										74.6667	8.17707	0.02
										74.75	8.17707	0.02
										74.8333	8.17707	0.02
										74.9167	8.17607	0.02
										75	8.17607	0.02
										75.0833	8.17407	0.02
										75.1667	8.17407	0.02
										75.25	8.17407	0.02
										75.3333	8.17307	0.02
										75.4167	8.17307	0.02
										75.5	8.17307	0.02
										75.5833	8.17207	0.02
										75.6667	8.17207	0.02
										75.75	8.17207	0.02
										75.8333	8.17207	0.02
										75.9167	8.17107	0.02
										76	8.17107	0.02
										76.0833	8.17107	0.02
										76.1667	8.17107	0.02
										76.25	8.17107	0.02
										76.3333	8.17107	0.02
										76.4167	8.17107	0.02
										76.5	8.17107	0.02
										76.5833	8.17107	0.02
										76.6667	8.17107	0.02
										76.75	8.17107	0.02
										76.8333	8.17107	0.02
										76.9167	8.17107	0.02
										77	8.17107	0.02
										77.0833	8.17107	0.02
										77.1667	8.17207	0.02
										77.25	8.17207	0.02
										77.3333	8.17207	0.02
										77.4167	8.17207	0.02
										77.5	8.17207	0.02
										77.5833	8.17207	0.02
										77.6667	8.17207	0.02
										77.75	8.17207	0.02
										77.8333	8.17207	0.02
										77.9167	8.17207	0.02
										78	8.17207	0.02
										78.0833	8.17107	0.02
										78.1667	8.17107	0.02
										78.25	8.17107	0.02
										78.3333	8.17107	0.02
										78.4167	8.17107	0.02
										78.5	8.17107	0.02
										78.5833	8.17107	0.02
										78.6667	8.17107	0.02
										78.75	8.17107	0.02
										78.8333	8.17107	0.02
										78.9167	8.17107	0.02
										79	8.17107	0.02
										79.0833	8.17107	0.02
										79.1667	8.17107	0.02
										79.25	8.17107	0.02
										79.3333	8.17107	0.02
										79.4167	8.17107	0.02
										79.5	8.17107	0.02
										79.5833	8.17107	0.02
										79.6667	8.17107	0.02
										79.75	8.17107	0.02
										79.8333	8.17107	0.02
										79.9167	8.17107	0.02
										80	8.17107	0.02
										80.0833	8.17107	0.02
										80.1667	8.17107	0.02
										80.25	8.17207	0.02
										80.3333	8.17207	0.02
										80.4167	8.17207	0.02
										80.5	8.17207	0.02
										80.5833	8.17207	0.02
										80.6667	8.17207	0.02
										80.75	8.17207	0.02
										80.8333	8.17207	0.02
										80.9167	8.17207	0.02
										81	8.17207	0.02
										81.0833	8.17207	0.02
										81.1667	8.17207	0.02
										81.25	8.17207	0.02
										81.3333	8.17207	0.02
										81.4167	8.17207	0.02
										81.5	8.17107	0.02
										81.5833	8.17107	0.02
										81.6667	8.17107	0.02
										81.75	8.17107	0.02
										81.8333	8.17107	0.02
										81.9167	8.17107	0.02
										82	8.17207	0.02
										82.0833	8.17107	0.02
										82.1667	8.17107	0.02
										82.25	8.17107	0.02
										82.3333	8.17107	0.02
										82.4167	8.17107	0.02
										82.5	8.17107	0.02
										82.5833	8.17107	0.02
										82.6667	8.17107	0.02
										82.75	8.17007	0.02
										82.8333	8.17007	0.02
										82.9167	8.17007	0.02
										83	8.16907	0.02
										83.0833	8.16907	0.02
										83.1667	8.16907	0.02
										83.25	8.16907	0.02
										83.3333	8.16907	0.02
										83.4167	8.16907	0.02
										83.5	8.16907	0.02
										83.5833	8.16907	0.02
										83.6667	8.16907	0.02
										83.75	8.16907	0.02
										83.8333	8.17007	0.02
										83.9167	8.17007	0.02
										84	8.16907	0.02
										84.0833	8.16907	0.02
										84.1667	8.16907	0.02
										84.25	8.16907	0.02
										84.3333	8.16907	0.02
										84.4167	8.16807	0.02
										84.5	8.16807	0.02
										84.5833	8.16807	0.02
										84.6667	8.16807	0.02
										84.75	8.16807	0.02
										84.8333	8.16707	0.02
										84.9167	8.16707	0.02
										85	8.16707	0.02
										85.0833	8.16707	0.02
										85.1667	8.16707	0.02
										85.25	8.16707	0.02
										85.3333	8.16607	0.02
										85.4167	8.16607	0.02
										85.5	8.16607	0.02
										85.5833	8.16607	0.02
										85.6667	8.16607	0.02
										85.75	8.16607	0.02
										85.8333	8.16607	0.02
										85.9167	8.16607	0.02
										86	8.16607	0.02
										86.0833	8.16607	0.02
										86.1667	8.16607	0.02
										86.25	8.16607	0.02
										86.3333	8.16607	0.02
										86.4167	8.16607	0.02
										86.5	8.16607	0.02
										86.5833	8.16607	0.02
										86.6667	8.16607	0.02
										86.75	8.16607	0.02
										86.8333	8.16607	0.02
										86.9167	8.16607	0.02
										87	8.16607	0.02
										87.0833	8.16607	0.02
										87.1667	8.16607	0.02
										87.25	8.16607	0.02
										87.3333	8.16607	0.02
										87.4167	8.16607	0.02
										87.5	8.16607	0.02
										87.5833	8.16607	0.02
										87.6667	8.16507	0.02
										87.75	8.16507	0.02
										87.8333	8.16507	0.02
										87.9167	8.16407	0.02
										88	8.16407	0.02
										88.0833	8.16407	0.02
										88.1667	8.16407	0.02
										88.25	8.16407	0.02
										88.3333	8.16407	0.02
										88.4167	8.16407	0.02
										88.5	8.16407	0.02
										88.5833	8.16407	0.02
										88.6667	8.16407	0.02
										88.75	8.16407	0.02
										88.8333	8.16407	0.02
										88.9167	8.16407	0.02
										89	8.16407	0.02
										89.0833	8.16407	0.02
										89.1667	8.16407	0.02
										89.25	8.16407	0.02
										89.3333	8.16407	0.02
										89.4167	8.16407	0.02
										89.5	8.16307	0.02
										89.5833	8.16407	0.02
										89.6667	8.16407	0.02
										89.75	8.16407	0.02
										89.8333	8.16407	0.02
										89.9167	8.16407	0.02
										90	8.16407	0.02
										90.0833	8.16407	0.02
										90.1667	8.16407	0.02
										90.25	8.16407	0.02
										90.3333	8.16407	0.02
										90.4167	8.16407	0.02
										90.5	8.16507	0.02
										90.5833	8.16507	0.02
										90.6667	8.16507	0.02
										90.75	8.16507	0.02
										90.8333	8.16507	0.02
										90.9167	8.16507	0.02
										91	8.16507	0.02
										91.0833	8.16507	0.02
										91.1667	8.16507	0.02
										91.25	8.16507	0.02
										91.3333	8.16507	0.02
										91.4167	8.16507	0.02
										91.5	8.16507	0.02
										91.5833	8.16507	0.02
										91.6667	8.16507	0.02
										91.75	8.16507	0.02
										91.8333	8.16507	0.02
										91.9167	8.16607	0.02
										92	8.16607	0.02
										92.0833	8.16607	0.02
										92.1667	8.16607	0.02
										92.25	8.16707	0.02
										92.3333	8.16707	0.02
										92.4167	8.16707	0.02
										92.5	8.16707	0.02
										92.5833	8.16707	0.02
										92.6667	8.16707	0.02
										92.75	8.16707	0.02
										92.8333	8.16707	0.02
										92.9167	8.16707	0.02
										93	8.16707	0.02
										93.0833	8.16707	0.02
										93.1667	8.16707	0.02
										93.25	8.16707	0.02
										93.3333	8.16707	0.02
										93.4167	8.16707	0.02
										93.5	8.16707	0.02
										93.5833	8.16807	0.02
										93.6667	8.16707	0.02
										93.75	8.16707	0.02
										93.8333	8.16807	0.02
										93.9167	8.16807	0.02
										94	8.16707	0.02
										94.0833	8.16707	0.02
										94.1667	8.16507	0.02
										94.25	8.16307	0.02
										94.3333	8.16007	0.02
										94.4167	8.15807	0.02
										94.5	8.15807	0.02
										94.5833	8.15707	0.02
										94.6667	8.15707	0.02
										94.75	8.15607	0.02
										94.8333	8.15607	0.02
										94.9167	8.15407	0.02
										95	8.15307	0.02
										95.0833	8.15107	0.02
										95.1667	8.15007	0.02
										95.25	8.14907	0.02
										95.3333	8.14707	0.02
										95.4167	8.14707	0.02
										95.5	8.14507	0.02
										95.5833	8.14707	0.02
										95.6667	8.14707	0.02
										95.75	8.14707	0.02
										95.8333	8.14707	0.02
										95.9167	8.14607	0.02
										96	8.14507	0.02
										96.0833	8.14507	0.02
										96.1667	8.14507	0.02
										96.25	8.14507	0.02
										96.3333	8.14707	0.02
										96.4167	8.14907	0.02
										96.5	8.15107	0.02
										96.5833	8.15207	0.02
										96.6667	8.15307	0.02
										96.75	8.15207	0.02
										96.8333	8.15107	0.02
										96.9167	8.15107	0.02
										97	8.15207	0.02
										97.0833	8.15407	0.02
										97.1667	8.15407	0.02
										97.25	8.15407	0.02
										97.3333	8.15407	0.02
										97.4167	8.15507	0.02
										97.5	8.15507	0.02
										97.5833	8.15407	0.02
										97.6667	8.15407	0.02
										97.75	8.15307	0.02
										97.8333	8.15207	0.02
										97.9167	8.15207	0.02
										98	8.15007	0.02
										98.0833	8.15007	0.02
										98.1667	8.15007	0.02
										98.25	8.15007	0.02
										98.3333	8.14907	0.02
										98.4167	8.15007	0.02
										98.5	8.15107	0.02
										98.5833	8.15307	0.02
										98.6667	8.15407	0.02
										98.75	8.15507	0.02
										98.8333	8.15707	0.02
										98.9167	8.15707	0.02
										99	8.15907	0.02
										99.0833	8.16007	0.02
										99.1667	8.16007	0.02
										99.25	8.16207	0.02
										99.3333	8.16207	0.02
										99.4167	8.16307	0.02
										99.5	8.16407	0.02
										99.5833	8.16407	0.02
										99.6667	8.16507	0.02
										99.75	8.16507	0.02
										99.8333	8.16607	0.02
										99.9167	8.16607	0.02
										100	8.16607	0.02
										100.083	8.16607	0.02
										100.167	8.16607	0.02
										100.25	8.16707	0.02
										100.333	8.16707	0.02
										100.417	8.16807	0.02
										100.5	8.16807	0.02
										100.583	8.16807	0.02
										100.667	8.16807	0.02
										100.75	8.16907	0.02
										100.833	8.16907	0.02
										100.917	8.16907	0.02
										101	8.17007	0.02
										101.083	8.17107	0.02
										101.167	8.17107	0.02
										101.25	8.17107	0.02
										101.333	8.17107	0.02
										101.417	8.17007	0.02
										101.5	8.17107	0.02
										101.583	8.17107	0.02
										101.667	8.17207	0.02
										101.75	8.17207	0.02
										101.833	8.17207	0.02
										101.917	8.17307	0.02
										102	8.17307	0.02
										102.083	8.17307	0.02
										102.167	8.17307	0.02
										102.25	8.17207	0.02
										102.333	8.17207	0.02
										102.417	8.17207	0.02
										102.5	8.17307	0.02
										102.583	8.17307	0.02
										102.667	8.17307	0.02
										102.75	8.17407	0.02
										102.833	8.17407	0.02
										102.917	8.17407	0.02
										103	8.17407	0.02
										103.083	8.17507	0.02
										103.167	8.17507	0.02
										103.25	8.17507	0.02
										103.333	8.17507	0.02
										103.417	8.17607	0.02
										103.5	8.17507	0.02
										103.583	8.17607	0.02
										103.667	8.17607	0.02
										103.75	8.17607	0.02
										103.833	8.17707	0.02
										103.917	8.17707	0.02
										104	8.17707	0.02
										104.083	8.17807	0.02
										104.167	8.17807	0.02
										104.25	8.17807	0.02
										104.333	8.17807	0.02
										104.417	8.17807	0.02
										104.5	8.17807	0.02
										104.583	8.17807	0.02
										104.667	8.17807	0.02
										104.75	8.17807	0.02
										104.833	8.17807	0.02
										104.917	8.17807	0.02
										105	8.17807	0.02
										105.083	8.17807	0.02
										105.167	8.17807	0.02
										105.25	8.17807	0.02
										105.333	8.17807	0.02
										105.417	8.17707	0.02
										105.5	8.17807	0.02
										105.583	8.17707	0.02
										105.667	8.17807	0.02
										105.75	8.17807	0.02
										105.833	8.17807	0.02
										105.917	8.17807	0.02
										106	8.17707	0.02
										106.083	8.17707	0.02
										106.167	8.17707	0.02
										106.25	8.17707	0.02
										106.333	8.17707	0.02
										106.417	8.17707	0.02
										106.5	8.17707	0.02
										106.583	8.17707	0.02
										106.667	8.17707	0.02
										106.75	8.17707	0.02
										106.833	8.17607	0.02
										106.917	8.17507	0.02
										107	8.17507	0.02
										107.083	8.17507	0.02
										107.167	8.17507	0.02
										107.25	8.17507	0.02
										107.333	8.17507	0.02
										107.417	8.17607	0.02
										107.5	8.17607	0.02
										107.583	8.17607	0.02
										107.667	8.17607	0.02
										107.75	8.17607	0.02
										107.833	8.17507	0.02
										107.917	8.17507	0.02
										108	8.17507	0.02
										108.083	8.17507	0.02
										108.167	8.17507	0.02
										108.25	8.17507	0.02
										108.333	8.17507	0.02
										108.417	8.17507	0.02
										108.5	8.17507	0.02
										108.583	8.17507	0.02
										108.667	8.17407	0.02
										108.75	8.17407	0.02
										108.833	8.17407	0.02
										108.917	8.17307	0.02
										109	8.17407	0.02
										109.083	8.17407	0.02
										109.167	8.17407	0.02
										109.25	8.17407	0.02
										109.333	8.17407	0.02
										109.417	8.17407	0.02
										109.5	8.17407	0.02
										109.583	8.17307	0.02
										109.667	8.17307	0.02
										109.75	8.17307	0.02
										109.833	8.17407	0.02
										109.917	8.17407	0.02
										110	8.17307	0.02
										110.083	8.17307	0.02
										110.167	8.17307	0.02
										110.25	8.17307	0.02
										110.333	8.17207	0.02
										110.417	8.17207	0.02
										110.5	8.17207	0.02
										110.583	8.17207	0.02
										110.667	8.17207	0.02
										110.75	8.17207	0.02
										110.833	8.17207	0.02
										110.917	8.17207	0.02
										111	8.17207	0.02
										111.083	8.17207	0.02
										111.167	8.17307	0.02
										111.25	8.17307	0.02
										111.333	8.17207	0.02
										111.417	8.17207	0.02
										111.5	8.17207	0.02
										111.583	8.17107	0.02
										111.667	8.17107	0.02
										111.75	8.17007	0.02
										111.833	8.17007	0.02
										111.917	8.17007	0.02
										112	8.17007	0.02
										112.083	8.17007	0.02
										112.167	8.17007	0.02
										112.25	8.17007	0.02
										112.333	8.16907	0.02
										112.417	8.16907	0.02
										112.5	8.16807	0.02
										112.583	8.16707	0.02
										112.667	8.16707	0.02
										112.75	8.16707	0.02
										112.833	8.16607	0.02
										112.917	8.16607	0.02
										113	8.16607	0.02
										113.083	8.16507	0.02
										113.167	8.16507	0.02
										113.25	8.16407	0.02
										113.333	8.16407	0.02
										113.417	8.16307	0.02
										113.5	8.16307	0.02
										113.583	8.16207	0.02
										113.667	8.16207	0.02
										113.75	8.16207	0.02
										113.833	8.16107	0.02
										113.917	8.16107	0.02
										114	8.16107	0.02
										114.083	8.16107	0.02
										114.167	8.16107	0.02
										114.25	8.16107	0.02
										114.333	8.16107	0.02
										114.417	8.16107	0.02
										114.5	8.16207	0.02
										114.583	8.16207	0.02
										114.667	8.16207	0.02
										114.75	8.16207	0.02
										114.833	8.16207	0.02
										114.917	8.16107	0.02
										115	8.16107	0.02
										115.083	8.16107	0.02
										115.167	8.16107	0.02
										115.25	8.16107	0.02
										115.333	8.16107	0.02
										115.417	8.16107	0.02
										115.5	8.16007	0.02
										115.583	8.16007	0.02
										115.667	8.16007	0.02
										115.75	8.15907	0.02
										115.833	8.15907	0.02
										115.917	8.15907	0.02
										116	8.15807	0.02
										116.083	8.15807	0.02
										116.167	8.15807	0.02
										116.25	8.15807	0.02
										116.333	8.15807	0.02
										116.417	8.15807	0.02
										116.5	8.15807	0.02
										116.583	8.15807	0.02
										116.667	8.15807	0.02
										116.75	8.15907	0.02
										116.833	8.15907	0.02
										116.917	8.15907	0.02
										117	8.15907	0.02
										117.083	8.15907	0.02
										117.167	8.15907	0.02
										117.25	8.15907	0.02
										117.333	8.15907	0.02
										117.417	8.15907	0.02
										117.5	8.15907	0.02
										117.583	8.16007	0.02
										117.667	8.16007	0.02
										117.75	8.16007	0.02
										117.833	8.16107	0.02
										117.917	8.16107	0.02
										118	8.16107	0.02
										118.083	8.16207	0.02
										118.167	8.16207	0.02
										118.25	8.16207	0.02
										118.333	8.16307	0.02
										118.417	8.16307	0.02
										118.5	8.16407	0.02
										118.583	8.16507	0.02
										118.667	8.16507	0.02
										118.75	8.16607	0.02
										118.833	8.16607	0.02
										118.917	8.16607	0.02
										119	8.16607	0.02
										119.083	8.16707	0.02
										119.167	8.16707	0.02
										119.25	8.16707	0.02
										119.333	8.16807	0.02
										119.417	8.16907	0.02
										119.5	8.16907	0.02
										119.583	8.16907	0.02
										119.667	8.16907	0.02
										119.75	8.16907	0.02
										119.833	8.16907	0.02
										119.917	8.16907	0.02
										120	8.16907	0.02
										120.083	8.16907	0.02
										120.167	8.16907	0.02
										120.25	8.16807	0.02
										120.333	8.16807	0.02
										120.417	8.16807	0.02
										120.5	8.16707	0.02
										120.583	8.16707	0.02
										120.667	8.16707	0.02
										120.75	8.16707	0.02
										120.833	8.16707	0.02
										120.917	8.16707	0.02
										121	8.16707	0.02
										121.083	8.16707	0.02
										121.167	8.16707	0.02
										121.25	8.16707	0.02
										121.333	8.16807	0.02
										121.417	8.16807	0.02
										121.5	8.16807	0.02
										121.583	8.16707	0.02
										121.667	8.16707	0.02
										121.75	8.16707	0.02
										121.833	8.16607	0.02
										121.917	8.16507	0.02
										122	8.16407	0.02
										122.083	8.16407	0.02
										122.167	8.16307	0.02
										122.25	8.16307	0.02
										122.333	8.16307	0.02
										122.417	8.16207	0.02
										122.5	8.16207	0.02
										122.583	8.16207	0.02
										122.667	8.16207	0.02
										122.75	8.16107	0.02
										122.833	8.16107	0.02
										122.917	8.16107	0.02
										123	8.16107	0.02
										123.083	8.16107	0.02
										123.167	8.16107	0.02
										123.25	8.16107	0.02
										123.333	8.16207	0.02
										123.417	8.16207	0.02
										123.5	8.16307	0.02
										123.583	8.16307	0.02
										123.667	8.16307	0.02
										123.75	8.16307	0.02
										123.833	8.16307	0.02
										123.917	8.16407	0.02
										124	8.16407	0.02
										124.083	8.16507	0.02
										124.167	8.16507	0.02
										124.25	8.16607	0.02
										124.333	8.16607	0.02
										124.417	8.16707	0.02
										124.5	8.16707	0.02
										124.583	8.16707	0.02
										124.667	8.16707	0.02
										124.75	8.16707	0.02
										124.833	8.16807	0.02
										124.917	8.16807	0.02
										125	8.16807	0.02
										125.083	8.16807	0.02
										125.167	8.16807	0.02
										125.25	8.16907	0.02
										125.333	8.16907	0.02
										125.417	8.16807	0.02
										125.5	8.16807	0.02
										125.583	8.16807	0.02
										125.667	8.16907	0.02
										125.75	8.16907	0.02
										125.833	8.16907	0.02
										125.917	8.16907	0.02
										126	8.16907	0.02
										126.083	8.16807	0.02
										126.167	8.16807	0.02
										126.25	8.16907	0.02
										126.333	8.16907	0.02
										126.417	8.16907	0.02
										126.5	8.16907	0.02
										126.583	8.16907	0.02
										126.667	8.17007	0.02
										126.75	8.17007	0.02
										126.833	8.17007	0.02
										126.917	8.17107	0.02
										127	8.17107	0.02
										127.083	8.17107	0.02
										127.167	8.17107	0.02
										127.25	8.17107	0.02
										127.333	8.17207	0.02
										127.417	8.17307	0.02
										127.5	8.17307	0.02
										127.583	8.17207	0.02
										127.667	8.17207	0.02
										127.75	8.17307	0.02
										127.833	8.17307	0.02
										127.917	8.17407	0.02
										128	8.17407	0.02
										128.083	8.17507	0.02
										128.167	8.17507	0.02
										128.25	8.17507	0.02
										128.333	8.17507	0.02
										128.417	8.17507	0.02
										128.5	8.17507	0.02
										128.583	8.17507	0.02
										128.667	8.17507	0.02
										128.75	8.17507	0.02
										128.833	8.17507	0.02
										128.917	8.17507	0.02
										129	8.17507	0.02
										129.083	8.17507	0.02
										129.167	8.17507	0.02
										129.25	8.17407	0.02
										129.333	8.17507	0.02
										129.417	8.17507	0.02
										129.5	8.17407	0.02
										129.583	8.17407	0.02
										129.667	8.17407	0.02
										129.75	8.17407	0.02
										129.833	8.17407	0.02
										129.917	8.17407	0.02
										130	8.17407	0.02
										130.083	8.17407	0.02
										130.167	8.17307	0.02
										130.25	8.17307	0.02
										130.333	8.17307	0.02
										130.417	8.17307	0.02
										130.5	8.17307	0.02
										130.583	8.17307	0.02
										130.667	8.17307	0.02
										130.75	8.17207	0.02
										130.833	8.17207	0.02
										130.917	8.17207	0.02
										131	8.17207	0.02
										131.083	8.17207	0.02
										131.167	8.17207	0.02
										131.25	8.17207	0.02
										131.333	8.17207	0.02
										131.417	8.17207	0.02
										131.5	8.17207	0.02
										131.583	8.17207	0.02
										131.667	8.17207	0.02
										131.75	8.17107	0.02
										131.833	8.17107	0.02
										131.917	8.17107	0.02
										132	8.17107	0.02
										132.083	8.17107	0.02
										132.167	8.17107	0.02
										132.25	8.17107	0.02
										132.333	8.17007	0.02
										132.417	8.17007	0.02
										132.5	8.17007	0.02
										132.583	8.17007	0.02
										132.667	8.17007	0.02
										132.75	8.17007	0.02
										132.833	8.17007	0.02
										132.917	8.17007	0.02
										133	8.17007	0.02
										133.083	8.17007	0.02
										133.167	8.17007	0.02
										133.25	8.16907	0.02
										133.333	8.16907	0.02
										133.417	8.16907	0.02
										133.5	8.16807	0.02
										133.583	8.16907	0.02
										133.667	8.16807	0.02
										133.75	8.16807	0.02
										133.833	8.16807	0.02
										133.917	8.16907	0.02
										134	8.16907	0.02
										134.083	8.16807	0.02
										134.167	8.16807	0.02
										134.25	8.16807	0.02
										134.333	8.16807	0.02
										134.417	8.16807	0.02
										134.5	8.16807	0.02
										134.583	8.16907	0.02
										134.667	8.16907	0.02
										134.75	8.16907	0.02
										134.833	8.16907	0.02
										134.917	8.16907	0.02
										135	8.16907	0.02
										135.083	8.16907	0.02
										135.167	8.16907	0.02
										135.25	8.16907	0.02
										135.333	8.16907	0.02
										135.417	8.16907	0.02
										135.5	8.16807	0.02
										135.583	8.16707	0.02
										135.667	8.16707	0.02
										135.75	8.16707	0.02
										135.833	8.16707	0.02
										135.917	8.16707	0.02
										136	8.16707	0.02
										136.083	8.16707	0.02
										136.167	8.16707	0.02
										136.25	8.16707	0.02
										136.333	8.16707	0.02
										136.417	8.16607	0.02
										136.5	8.16507	0.02
										136.583	8.16507	0.02
										136.667	8.16407	0.02
										136.75	8.16407	0.02
										136.833	8.16407	0.02
										136.917	8.16407	0.02
										137	8.16407	0.02
										137.083	8.16407	0.02
										137.167	8.16307	0.02
										137.25	8.16307	0.02
										137.333	8.16307	0.02
										137.417	8.16307	0.02
										137.5	8.16307	0.02
										137.583	8.16407	0.02
										137.667	8.16307	0.02
										137.75	8.16307	0.02
										137.833	8.16407	0.02
										137.917	8.16407	0.02
										138	8.16407	0.02
										138.083	8.16407	0.02
										138.167	8.16307	0.02
										138.25	8.16307	0.02
										138.333	8.16307	0.02
										138.417	8.16307	0.02
										138.5	8.16307	0.02
										138.583	8.16207	0.02
										138.667	8.16207	0.02
										138.75	8.16207	0.02
										138.833	8.16207	0.02
										138.917	8.16207	0.02
										139	8.16107	0.02
										139.083	8.16107	0.02
										139.167	8.16107	0.02
										139.25	8.16107	0.02
										139.333	8.16107	0.02
										139.417	8.16107	0.02
										139.5	8.16107	0.02
										139.583	8.16007	0.02
										139.667	8.16007	0.02
										139.75	8.16007	0.02
										139.833	8.15907	0.02
										139.917	8.15907	0.02
										140	8.15807	0.02
										140.083	8.15807	0.02
										140.167	8.15707	0.02
										140.25	8.15807	0.02
										140.333	8.15707	0.02
										140.417	8.15707	0.02
										140.5	8.15707	0.02
										140.583	8.15607	0.02
										140.667	8.15407	0.02
										140.75	8.15407	0.02
										140.833	8.15307	0.02
										140.917	8.15207	0.02
										141	8.15107	0.02
										141.083	8.15107	0.02
										141.167	8.15007	0.02
										141.25	8.15107	0.02
										141.333	8.15107	0.02
										141.417	8.15207	0.02
										141.5	8.15307	0.02
										141.583	8.15307	0.02
										141.667	8.15407	0.02
										141.75	8.15307	0.02
										141.833	8.15207	0.02
										141.917	8.15207	0.02
										142	8.15007	0.02
										142.083	8.14907	0.02
										142.167	8.14807	0.02
										142.25	8.14607	0.02
										142.333	8.14607	0.02
										142.417	8.14507	0.02
										142.5	8.14407	0.02
										142.583	8.14307	0.02
										142.667	8.14307	0.02
										142.75	8.14307	0.02
										142.833	8.14307	0.02
										142.917	8.14207	0.02
										143	8.14207	0.02
										143.083	8.14207	0.02
										143.167	8.14307	0.02
										143.25	8.14407	0.02
										143.333	8.14507	0.02
										143.417	8.14607	0.02
										143.5	8.14707	0.02
										143.583	8.14807	0.02
										143.667	8.14807	0.02
										143.75	8.14807	0.02
										143.833	8.14807	0.02
										143.917	8.14907	0.02
										144	8.14907	0.02
										144.083	8.14907	0.02
										144.167	8.15007	0.02
										144.25	8.15007	0.02
										144.333	8.15007	0.02
										144.417	8.15007	0.02
										144.5	8.14907	0.02
										144.583	8.14907	0.02
										144.667	8.15007	0.02
										144.75	8.15007	0.02
										144.833	8.15107	0.02
										144.917	8.15207	0.02
										145	8.15307	0.02
										145.083	8.15407	0.02
										145.167	8.15407	0.02
										145.25	8.15507	0.02
										145.333	8.15607	0.02
										145.417	8.15607	0.02
										145.5	8.15607	0.02
										145.583	8.15707	0.02
										145.667	8.15807	0.02
										145.75	8.15807	0.02
										145.833	8.15807	0.02
										145.917	8.15707	0.02
										146	8.15507	0.02
										146.083	8.15307	0.02
										146.167	8.15007	0.02
										146.25	8.14807	0.02
										146.333	8.14607	0.02
										146.417	8.14507	0.02
										146.5	8.14407	0.02
										146.583	8.14307	0.02
										146.667	8.14307	0.02
										146.75	8.14207	0.02
										146.833	8.14007	0.02
										146.917	8.13907	0.02
										147	8.13907	0.02
										147.083	8.13907	0.02
										147.167	8.13707	0.02
										147.25	8.13607	0.02
										147.333	8.13607	0.02
										147.417	8.13407	0.02
										147.5	8.13307	0.02
										147.583	8.13207	0.02
										147.667	8.13107	0.02
										147.75	8.13107	0.02
										147.833	8.13107	0.02
										147.917	8.13307	0.02
										148	8.13407	0.02
										148.083	8.13707	0.02
										148.167	8.13907	0.02
										148.25	8.14107	0.02
										148.333	8.14307	0.02
										148.417	8.14507	0.02
										148.5	8.14707	0.02
										148.583	8.14707	0.02
										148.667	8.14607	0.02
										148.75	8.14407	0.02
										148.833	8.14307	0.02
										148.917	8.14207	0.02
										149	8.14007	0.02
										149.083	8.14007	0.02
										149.167	8.14007	0.02
										149.25	8.14007	0.02
										149.333	8.13907	0.02
										149.417	8.13907	0.02
										149.5	8.14107	0.02
										149.583	8.14307	0.02
										149.667	8.14407	0.02
										149.75	8.14607	0.02
										149.833	8.14807	0.02
										149.917	8.15007	0.02
										150	8.15107	0.02
										150.083	8.15307	0.02
										150.167	8.15307	0.02
										150.25	8.15507	0.02
										150.333	8.15607	0.02
										150.417	8.15707	0.02
										150.5	8.15907	0.02
										150.583	8.15907	0.02
										150.667	8.16007	0.02
										150.75	8.16107	0.02
										150.833	8.16207	0.02
										150.917	8.16307	0.02
										151	8.16307	0.02
										151.083	8.16407	0.02
										151.167	8.16507	0.02
										151.25	8.16607	0.02
										151.333	8.16607	0.02
										151.417	8.16607	0.02
										151.5	8.16707	0.02
										151.583	8.16807	0.02
										151.667	8.16807	0.02
										151.75	8.16807	0.02
										151.833	8.16907	0.02
										151.917	8.17007	0.02
										152	8.17007	0.02
										152.083	8.17007	0.02
										152.167	8.17107	0.02
										152.25	8.17107	0.02
										152.333	8.17107	0.02
										152.417	8.17107	0.02
										152.5	8.17107	0.02
										152.583	8.17107	0.02
										152.667	8.17107	0.02
										152.75	8.17107	0.02
										152.833	8.17107	0.02
										152.917	8.17107	0.02
										153	8.17107	0.02
										153.083	8.17107	0.02
										153.167	8.17107	0.02
										153.25	8.17107	0.02
										153.333	8.17107	0.02
										153.417	8.17107	0.02
										153.5	8.17107	0.02
										153.583	8.17107	0.02
										153.667	8.17107	0.02
										153.75	8.17107	0.02
										153.833	8.17107	0.02
										153.917	8.17107	0.02
										154	8.17107	0.02
										154.083	8.17007	0.02
										154.167	8.17007	0.02
										154.25	8.17007	0.02
										154.333	8.17007	0.02
										154.417	8.17007	0.02
										154.5	8.17007	0.02
										154.583	8.17007	0.02
										154.667	8.17007	0.02
										154.75	8.17007	0.02
										154.833	8.16907	0.02
										154.917	8.16907	0.02
										155	8.16907	0.02
										155.083	8.16907	0.02
										155.167	8.16907	0.02
										155.25	8.16907	0.02
										155.333	8.16907	0.02
										155.417	8.16907	0.02
										155.5	8.16907	0.02
										155.583	8.16807	0.02
										155.667	8.16807	0.02
										155.75	8.16807	0.02
										155.833	8.16707	0.02
										155.917	8.16707	0.02
										156	8.16707	0.02
										156.083	8.16607	0.02
										156.167	8.16607	0.02
										156.25	8.16607	0.02
										156.333	8.16507	0.02
										156.417	8.16507	0.02
										156.5	8.16407	0.02
										156.583	8.16407	0.02
										156.667	8.16407	0.02
										156.75	8.16407	0.02
										156.833	8.16407	0.02
										156.917	8.16307	0.02
										157	8.16307	0.02
										157.083	8.16207	0.02
										157.167	8.16207	0.02
										157.25	8.16207	0.02
										157.333	8.16207	0.02
										157.417	8.16107	0.02
										157.5	8.16107	0.02
										157.583	8.16107	0.02
										157.667	8.16107	0.02
										157.75	8.16007	0.02
										157.833	8.16007	0.02
										157.917	8.16007	0.02
										158	8.16007	0.02
										158.083	8.15907	0.02
										158.167	8.15907	0.02
										158.25	8.15907	0.02
										158.333	8.15907	0.02
										158.417	8.15907	0.02
										158.5	8.15907	0.02
										158.583	8.15807	0.02
										158.667	8.15807	0.02
										158.75	8.15807	0.02
										158.833	8.15807	0.02
										158.917	8.15807	0.02
										159	8.15807	0.02
										159.083	8.15807	0.02
										159.167	8.15807	0.02
										159.25	8.15807	0.02
										159.333	8.15807	0.02
										159.417	8.15707	0.02
										159.5	8.15707	0.02
										159.583	8.15607	0.02
										159.667	8.15607	0.02
										159.75	8.15507	0.02
										159.833	8.15507	0.02
										159.917	8.15407	0.02
										160	8.15407	0.02
										160.083	8.15407	0.02
										160.167	8.15407	0.02
										160.25	8.15307	0.02
										160.333	8.15307	0.02
										160.417	8.15207	0.02
										160.5	8.15107	0.02
										160.583	8.15007	0.02
										160.667	8.14907	0.02
										160.75	8.14907	0.02
										160.833	8.14907	0.02
										160.917	8.14807	0.02
										161	8.14807	0.02
										161.083	8.14707	0.02
										161.167	8.14707	0.02
										161.25	8.14607	0.02
										161.333	8.14507	0.02
										161.417	8.14507	0.02
										161.5	8.14507	0.02
										161.583	8.14407	0.02
										161.667	8.14407	0.02
										161.75	8.14407	0.02
										161.833	8.14407	0.02
										161.917	8.14407	0.02
										162	8.14407	0.02
										162.083	8.14407	0.02
										162.167	8.14407	0.02
										162.25	8.14407	0.02
										162.333	8.14407	0.02
										162.417	8.14407	0.02
										162.5	8.14407	0.02
										162.583	8.14407	0.02
										162.667	8.14307	0.02
										162.75	8.14307	0.02
										162.833	8.14307	0.02
										162.917	8.14307	0.02
										163	8.14207	0.02
										163.083	8.14207	0.02
										163.167	8.14207	0.02
										163.25	8.14207	0.02
										163.333	8.14207	0.02
										163.417	8.14107	0.02
										163.5	8.14107	0.02
										163.583	8.14107	0.02
										163.667	8.14007	0.02
										163.75	8.14007	0.02
										163.833	8.14007	0.02
										163.917	8.14007	0.02
										164	8.14007	0.02
										164.083	8.14007	0.02
										164.167	8.14007	0.02
										164.25	8.14007	0.02
										164.333	8.14007	0.02
										164.417	8.14007	0.02
										164.5	8.14007	0.02
										164.583	8.14007	0.02
										164.667	8.13707	0.02
										164.75	8.13407	0.02
										164.833	8.13207	0.02
										164.917	8.13107	0.02
										165	8.12907	0.02
										165.083	8.12907	0.02
										165.167	8.13007	0.02
										165.25	8.13007	0.02
										165.333	8.13007	0.02
										165.417	8.13107	0.02
										165.5	8.13107	0.02
										165.583	8.13207	0.02
										165.667	8.13107	0.02
										165.75	8.13207	0.02
										165.833	8.13307	0.02
										165.917	8.13407	0.02
										166	8.13407	0.02
										166.083	8.13507	0.02
										166.167	8.13607	0.02
										166.25	8.13707	0.02
										166.333	8.13707	0.02
[truncated: 884 more rows]

## Sheet: Exp. VI
weight_Mg(OH)2	weight_Mg(OH)2	TA_Mg(OH)2	TA_Mg(OH)2_error	dTA_Mg(OH)2	DIC_Mg(OH)2	DIC_Mg(OH)2_error	pH_Mg(OH)2	pH_Mg(OH)2_error	Omega(ca)_Mg(OH)2	Omega(ca)_Mg(OH)2_error	Omega(ar)_Mg(OH)2	Omega(ar)_Mg(OH)2_error	weight_Ca(OH)2	TA_Ca(OH)2	dTA_Ca(OH)2_error	dTA_Ca(OH)2
[g] per L	[g] per 300g	[µmol/kgsw]	[µmol/kgsw]	[µmol/kgsw]	[µmol/kgsw]	[µmol/kgsw]	[]	[]	[]	[]	[]	[]	[g]	[µmol/kgsw]	[µmol/kgsw]	[µmol/kgsw]
0	0	2315.18	5.2	28.18	1962.09	15.4134	8.17807	0.02	6.11758	0.3862	3.99224	0.252043	0	2317.39	6.2	12.1687
0.00333333	0.001	2420.63	5.2	123.63	1947.29	18.0221	8.33107	0.02	8.20304	0.495588	5.35318	0.32343	0.05	1536.33	6.2	-768.887
0.0166667	0.005	2769.38	5.2	472.38	2190.39	20.9036	8.39507	0.02	10.4108	0.617592	6.79391	0.403051	0.25	769.507	6.2	-1535.71
0.0333333	0.01	3229.62	5.2	932.62	2491.72	24.8139	8.47807	0.02	13.7775	0.797069	8.99097	0.520179	0.5	656.44	6.2	-1648.78
0.0666667	0.02	3926.86	5.2	1629.86	2911.42	30.5687	8.59707	0.02	19.7691	1.10166	12.901	0.718954	1	545.045	6.2	-1760.17
0.1	0.03	2389.57	5.2	92.57	1875.77	18.5119	8.39007	0.02	8.83279	0.523642	5.76415	0.341737	2	23772.4	6.2	21467.1
0.166667	0.05	2772.46	5.2	475.46	2348.89	18.1203	8.20507	0.02	7.73191	0.48565	5.04573	0.316947
0.416667	0.125	1630.99	5.2	-666.01	1032.03	14.6843	8.72907	0.02	8.64514	0.455108	5.64169	0.296995
0.666667	0.2	1460.67	5.2	-836.33	762.032	12.1254	8.99707	0.02	9.15312	0.449781	5.97319	0.2935
1.66667	0.5	1707.7	5.2	-589.3	909.302	13.2756	9.03007	0.02	11.3437	0.554425	7.40273	0.361787
2.66667	0.8	1621.04	5.2	-675.96	814.961	12.2097	9.10207	0.02	10.9875	0.530519	7.17028	0.34618																			MgOH_block_DIC
3.33333	1	1531.75	5.2	-765.25	755.526	11.7177	9.10607	0.02	10.2282	0.493632	6.67474	0.322109																			1930.6
5	1.5	1542.44	5.2	-754.56	794.378	12.2627	9.04107	0.02	10.0327	0.489168	6.54719	0.3192																			1992.4
5.83333	1.75	1568.15	5.2	-728.85	793.207	12.1269	9.07707	0.02	10.4179	0.504948	6.79855	0.329495																			2242.8
6.66667	2	1813.54	5.2	-483.46	936.782	13.1869	9.10607	0.02	12.682	0.612066	8.27606	0.399397																			2553.9
13.3333	4	1615.85	5.2	-681.15	834.462	12.5414	9.05707	0.02	10.7262	0.521611	6.99975	0.340371																			2987.8
																															1922.2
																															2394.1
																															1068.4
																															790.1
																															940.3
																															842.5
																															781.6
																															822.5
																															820.7
																															967
																															863.3
Raw data experiment: VI
Description:
Thresholds, non-CO2-equilibrated, addding various weights of Mg(OH)2 and Ca(OH)2 in 300g seawater (2305 µmol/kgsw), runtime 1 day, abiotic 0.2 µm filtered
Mg(OH)2: 15 masses, single determination
Ca(OH)2: 6 masses, single determination, only TA measurements
Errors determined by uncertainty calculations in CO2SYS_v2.5, if replicates are available resulting deviations were included
Figure: 8
