# Supplementary material for: Stability of alkalinity in ocean alkalinity enhancement (OAE) approaches – consequences for durability of CO 2 storage
Source: Copernicus journal article supplement (doi:10.5194/bg-20-781-2023), 2023-02-20
Supplement: Supplementary file 2 [file bg-20-781-2023-supplement.zip]

## Supplement

### Stability of alkalinity in Ocean Alkalinity Enhancement (OAE) approaches - consequences for durability of CO<sub>2</sub> storage

Jens Hartmann<sup>1\*)</sup>, Niels Suitner<sup>1\*)</sup>, Carl Lim<sup>2)</sup>, Julieta Schneider<sup>3)</sup>, Laura Marín-Samper<sup>4)</sup>, Javier Arístegui<sup>4)</sup>, Phil Renforth<sup>5)</sup>, Jan Taucher<sup>3)</sup>, Ulf Riebesell<sup>3)</sup>

1) Institute for Geology, Universität Hamburg, Bundesstrasse 55, D-20146 Hamburg, Germany

2) Faculty of Physics/Electrical Engineering, Universität Bremen, Otto-Hahn-Allee 1, 28359 Bremen, Germany

3) Geomar Helmholtz Centre for Ocean Research Kiel, Kiel, Germany

4) Instituto de Oceanografía y Cambio Global, Universidad de Las Palmas de Gran Canaria, Las Palmas, Spain

5) School of Engineering and Physical Sciences, Heriot-Watt University, Edinburgh, EH14 4AS, UK

\*) These authors contributed equally

Correspondence to: Jens Hartmann ([geo@hattes.de](mailto:geo@hattes.de)), Niels Suitner ([niels.suitner@uni-hamburg.de](mailto:niels.suitner@uni-hamburg.de))

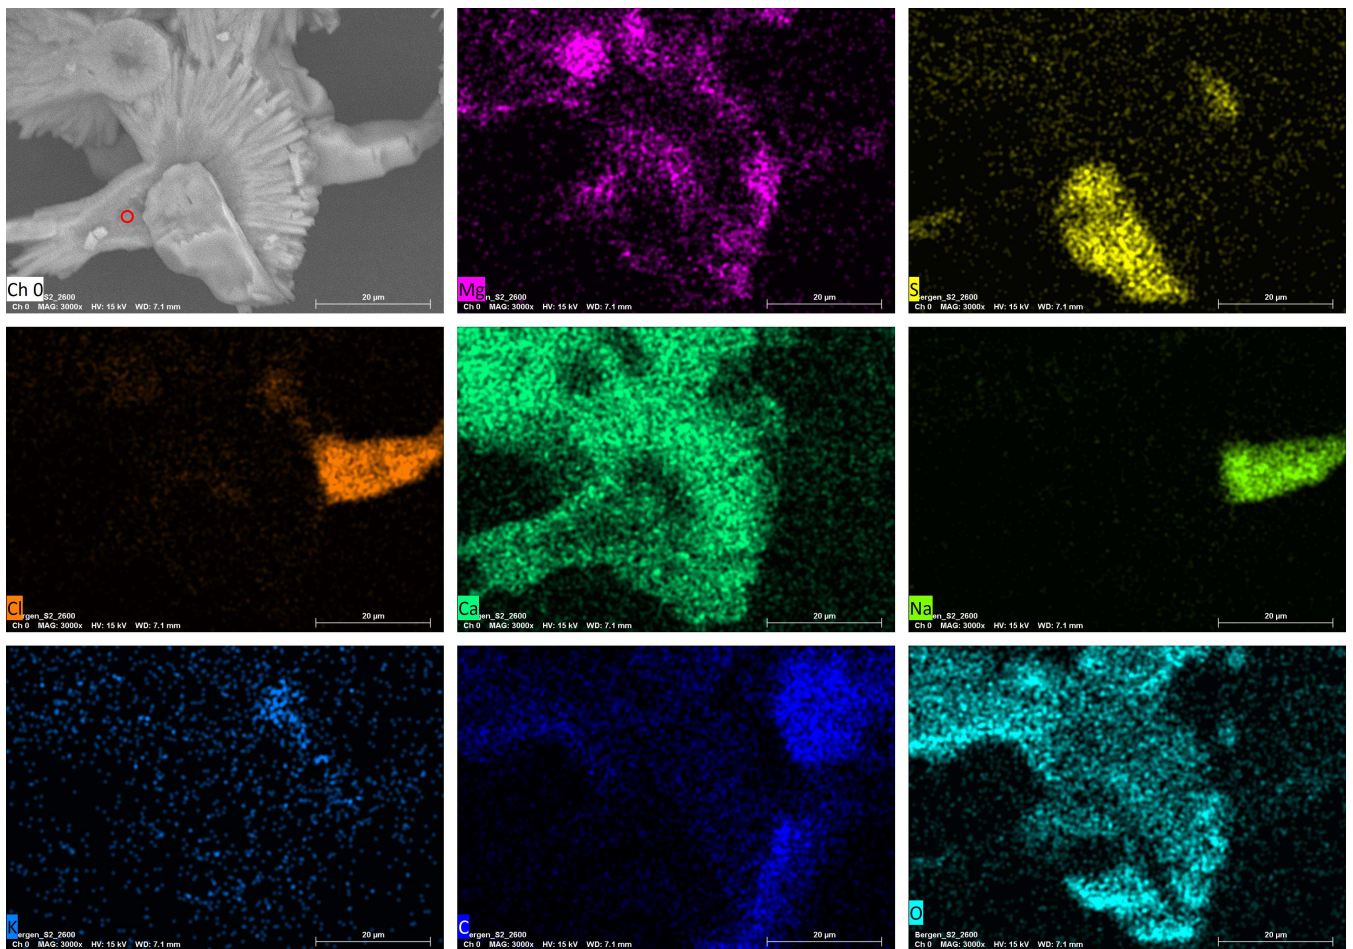

**Figure S1:** EDX-mapping of particle  $\gamma$  (Fig.9c – IV), showing the spatial elemental distribution of magnesium (Mg), sulfur (S), chlorine (Cl), calcium (Ca), sodium (Na), potassium (K), carbon (C) and oxygen (O); particle ( $\gamma$ ) is rich in calcium, magnesium and oxygen (carbon mapping due to carbonic composition of the background material invalid), indicating the formation of Ca-Mg-carbonate minerals during precipitation; the central part of ( $\gamma$ ) is covered by a gypsum crystal (Ca-S-O rich) which is, together with the NaCl salt crystal to the right, most likely a relic of the filtration process.

**Table S1:** Results of EDX-analysis of particle  $\gamma$  (Fig.9c – IV), location of analysis is shown in Fig.S1 (red circle - upper-left panel)

| Element | Mass [%] | Mass norm. [%] | Atom [%] | Abs. error [%] | Rel. Error [%] |
|---------|----------|----------------|----------|----------------|----------------|
| O       | 26.53    | 39.22          | 46.03    | 8.15           | 30.72          |
| C       | 14.11    | 20.87          | 32.63    | 4.95           | 35.05          |
| Ca      | 18.95    | 28.01          | 13.12    | 0.80           | 4.21           |
| Mg      | 5.38     | 7.96           | 6.15     | 0.50           | 9.36           |
| Cl      | 2.63     | 3.88           | 2.06     | 0.21           | 8.09           |
| Os      | 0.04     | 0.06           | 0.01     | 0.03           | 66.73          |
| Sum     | 67.64    | 100.00         | 100.00   |                |                |
